# Supplementary material for: Concussion in para sport: the first position statement of the Concussion in Para Sport (CIPS) Group
Source: HighWire-hosted journal article supplement (doi:10.1136/bjsports-2020-103696), 2021-04-09
Supplement: bjsports-2020-103696supp002_data_supplement.pdf [file bjsports-2020-103696supp002_data_supplement.pdf]

**Considerations and usability of the 5th edition of the Sport Concussion Assessment Tool (SCAT5) for the office or off-field assessment in athletes with (single) upper limb deficiency**

|                                                                          |                                                          |                          |
|--------------------------------------------------------------------------|----------------------------------------------------------|--------------------------|
| <b>STEP 1 ATHLETE BACKGROUND</b>                                         | Hospitalization for a head injury?                       | <input type="checkbox"/> |
|                                                                          | Headache disorder or migraines?                          | <input type="checkbox"/> |
|                                                                          | Learning disability / dyslexia?                          | <input type="checkbox"/> |
|                                                                          | ADD / ADHD?                                              | <input type="checkbox"/> |
|                                                                          | Depression, anxiety or other psychiatric disorder?       | <input type="checkbox"/> |
| <b>STEP 2 SYMPTOM EVALUATION</b>                                         | Headache                                                 | <input type="checkbox"/> |
|                                                                          | “Pressure in head”                                       | <input type="checkbox"/> |
|                                                                          | Neck pain                                                | <input type="checkbox"/> |
|                                                                          | Nausea or vomiting                                       | <input type="checkbox"/> |
|                                                                          | Dizziness                                                | <input type="checkbox"/> |
|                                                                          | Blurred vision                                           | <input type="checkbox"/> |
|                                                                          | Balance problems                                         | <input type="checkbox"/> |
|                                                                          | Sensitivity to light                                     | <input type="checkbox"/> |
|                                                                          | Sensitivity to noise                                     | <input type="checkbox"/> |
|                                                                          | Feeling slowed down                                      | <input type="checkbox"/> |
|                                                                          | Feeling like “in a fog”                                  | <input type="checkbox"/> |
|                                                                          | “Don’t feel right”                                       | <input type="checkbox"/> |
|                                                                          | Difficulty concentrating                                 | <input type="checkbox"/> |
|                                                                          | Difficulty remembering                                   | <input type="checkbox"/> |
|                                                                          | Fatigue or low energy                                    | <input type="checkbox"/> |
|                                                                          | Confusion                                                | <input type="checkbox"/> |
|                                                                          | Drowsiness                                               | <input type="checkbox"/> |
|                                                                          | More emotional                                           | <input type="checkbox"/> |
|                                                                          | Irritability                                             | <input type="checkbox"/> |
|                                                                          | Sadness                                                  | <input type="checkbox"/> |
| Nervous or anxious                                                       | <input type="checkbox"/>                                 |                          |
| Trouble falling asleep                                                   | <input type="checkbox"/>                                 |                          |
| Symptoms get worse with physical activity?                               | <input type="checkbox"/>                                 |                          |
| Symptoms get worse with mental activity?                                 | <input type="checkbox"/>                                 |                          |
| If 100% is feeling perfectly normal, what percent of normal do you feel? | <input type="checkbox"/>                                 |                          |
| <b>STEP 3 COGNITIVE SCREENING</b>                                        |                                                          |                          |
| <b>ORIENTATION</b>                                                       | Month                                                    | <input type="checkbox"/> |
|                                                                          | Today’s date                                             | <input type="checkbox"/> |
|                                                                          | Weekday                                                  | <input type="checkbox"/> |
|                                                                          | Current year                                             | <input type="checkbox"/> |
|                                                                          | Current time (within 1 hour)                             | <input type="checkbox"/> |
| <b>IMMEDIATE MEMORY</b>                                                  | Repeat as many words as possible from a read list        | <input type="checkbox"/> |
| <b>CONCENTRATION – Digits backwards</b>                                  | Repeat a string of numbers                               | <input type="checkbox"/> |
|                                                                          | Repeat a string of numbers in reverse order              | <input type="checkbox"/> |
| <b>MONTHS IN REVERSE ORDER</b>                                           | Tell the months of the year in reverse order             | <input type="checkbox"/> |
| <b>STEP 4 NEUROLOGICAL SCREEN</b>                                        | Read out loud and follow instructions without difficulty | <input type="checkbox"/> |
|                                                                          | Full range of pain-free PASSIVE cervical spine movement  | <input type="checkbox"/> |
|                                                                          | (fixed head) Look side-to-side and up-and-down           | <input type="checkbox"/> |

|                                                       |                                                                         |  |
|-------------------------------------------------------|-------------------------------------------------------------------------|--|
|                                                       | Perform finger nose coordination test normally                          |  |
|                                                       | Perform tandem gait normally                                            |  |
| <b>BALANCE EXAMINATION</b>                            | Double leg stance                                                       |  |
| Modified Balance Error Scoring System (mBESS) testing | Single leg stance (non-dominant foot)                                   |  |
|                                                       | Tandem stance (non-dominant foot at back)                               |  |
| <b>STEP 5 DELAYED RECALL</b>                          | Repeat as many words as possible from the previously read list (step 3) |  |

Green shading: no anticipated additional considerations for Para athletes; Yellow shading: potential additional considerations for some Para athletes (dependent on the level or nature of athlete impairment); Red shading: items from the SCAT5 that should not be used for Para athletes

**Considerations and usability of the 5th edition of the Sport Concussion Assessment Tool (SCAT5) for the office or off-field assessment in athletes with (bilateral) upper limb deficiency**

|                                                                          |                                                                                      |                                                                                      |
|--------------------------------------------------------------------------|--------------------------------------------------------------------------------------|--------------------------------------------------------------------------------------|
| <b>STEP 1 ATHLETE BACKGROUND</b>                                         | Hospitalization for a head injury?                                                   |    |
|                                                                          | Headache disorder or migraines?                                                      |    |
|                                                                          | Learning disability / dyslexia?                                                      |    |
|                                                                          | ADD / ADHD?                                                                          |    |
|                                                                          | Depression, anxiety or other psychiatric disorder?                                   |    |
| <b>STEP 2 SYMPTOM EVALUATION</b>                                         | Headache                                                                             |    |
|                                                                          | “Pressure in head”                                                                   |    |
|                                                                          | Neck pain                                                                            |    |
|                                                                          | Nausea or vomiting                                                                   |    |
|                                                                          | Dizziness                                                                            |    |
|                                                                          | Blurred vision                                                                       |    |
|                                                                          | Balance problems                                                                     |    |
|                                                                          | Sensitivity to light                                                                 |    |
|                                                                          | Sensitivity to noise                                                                 |    |
|                                                                          | Feeling slowed down                                                                  |    |
|                                                                          | Feeling like “in a fog”                                                              |   |
|                                                                          | “Don’t feel right”                                                                   |  |
|                                                                          | Difficulty concentrating                                                             |  |
|                                                                          | Difficulty remembering                                                               |  |
|                                                                          | Fatigue or low energy                                                                |  |
|                                                                          | Confusion                                                                            |  |
|                                                                          | Drowsiness                                                                           |  |
|                                                                          | More emotional                                                                       |  |
|                                                                          | Irritability                                                                         |  |
|                                                                          | Sadness                                                                              |  |
|                                                                          | Nervous or anxious                                                                   |  |
|                                                                          | Trouble falling asleep                                                               |  |
| Symptoms get worse with physical activity?                               |  |                                                                                      |
| Symptoms get worse with mental activity?                                 |  |                                                                                      |
| If 100% is feeling perfectly normal, what percent of normal do you feel? |  |                                                                                      |
| <b>STEP 3 COGNITIVE SCREENING</b>                                        |                                                                                      |                                                                                      |
| <b>ORIENTATION</b>                                                       | Month                                                                                |  |
|                                                                          | Today’s date                                                                         |  |
|                                                                          | Weekday                                                                              |  |
|                                                                          | Current year                                                                         |  |
|                                                                          | Current time (within 1 hour)                                                         |  |
| <b>IMMEDIATE MEMORY</b>                                                  | Repeat as many words as possible from a read list                                    |  |
| <b>CONCENTRATION – Digits backwards</b>                                  | Repeat a string of numbers                                                           |  |
|                                                                          | Repeat a string of numbers in reverse order                                          |  |
| <b>MONTHS IN REVERSE ORDER</b>                                           | Tell the months of the year in reverse order                                         |  |
| <b>STEP 4 NEUROLOGICAL SCREEN</b>                                        | Read out loud and follow instructions without difficulty                             |  |
|                                                                          | Full range of pain-free PASSIVE cervical spine movement                              |  |
|                                                                          | (fixed head) Look side-to-side and up-and-down                                       |  |

|                                                       |                                                                         |  |
|-------------------------------------------------------|-------------------------------------------------------------------------|--|
|                                                       | Perform finger nose coordination test normally                          |  |
|                                                       | Perform tandem gait normally                                            |  |
| <b>BALANCE EXAMINATION</b>                            | Double leg stance                                                       |  |
| Modified Balance Error Scoring System (mBESS) testing | Single leg stance (non-dominant foot)                                   |  |
|                                                       | Tandem stance (non-dominant foot at back)                               |  |
| <b>STEP 5 DELAYED RECALL</b>                          | Repeat as many words as possible from the previously read list (step 3) |  |

Green shading: no anticipated additional considerations for Para athletes; Yellow shading: potential additional considerations for some Para athletes (dependent on the level or nature of athlete impairment); Red shading: items from the SCAT5 that should not be used for Para athletes

**Considerations and usability of the 5th edition of the Sport Concussion Assessment Tool (SCAT5) for the office or off-field assessment in athletes with (single) lower limb deficiency**

|                                                                          |                                                                                      |                                                                                      |
|--------------------------------------------------------------------------|--------------------------------------------------------------------------------------|--------------------------------------------------------------------------------------|
| <b>STEP 1 ATHLETE BACKGROUND</b>                                         | Hospitalization for a head injury?                                                   |    |
|                                                                          | Headache disorder or migraines?                                                      |    |
|                                                                          | Learning disability / dyslexia?                                                      |    |
|                                                                          | ADD / ADHD?                                                                          |    |
|                                                                          | Depression, anxiety or other psychiatric disorder?                                   |    |
| <b>STEP 2 SYMPTOM EVALUATION</b>                                         | Headache                                                                             |    |
|                                                                          | “Pressure in head”                                                                   |    |
|                                                                          | Neck pain                                                                            |    |
|                                                                          | Nausea or vomiting                                                                   |    |
|                                                                          | Dizziness                                                                            |    |
|                                                                          | Blurred vision                                                                       |    |
|                                                                          | Balance problems                                                                     |    |
|                                                                          | Sensitivity to light                                                                 |    |
|                                                                          | Sensitivity to noise                                                                 |    |
|                                                                          | Feeling slowed down                                                                  |    |
|                                                                          | Feeling like “in a fog”                                                              |   |
|                                                                          | “Don’t feel right”                                                                   |  |
|                                                                          | Difficulty concentrating                                                             |  |
|                                                                          | Difficulty remembering                                                               |  |
|                                                                          | Fatigue or low energy                                                                |  |
|                                                                          | Confusion                                                                            |  |
|                                                                          | Drowsiness                                                                           |  |
|                                                                          | More emotional                                                                       |  |
|                                                                          | Irritability                                                                         |  |
|                                                                          | Sadness                                                                              |  |
| Nervous or anxious                                                       |  |                                                                                      |
| Trouble falling asleep                                                   |  |                                                                                      |
| Symptoms get worse with physical activity?                               |  |                                                                                      |
| Symptoms get worse with mental activity?                                 |  |                                                                                      |
| If 100% is feeling perfectly normal, what percent of normal do you feel? |  |                                                                                      |
| <b>STEP 3 COGNITIVE SCREENING</b>                                        |                                                                                      |                                                                                      |
| <b>ORIENTATION</b>                                                       | Month                                                                                |  |
|                                                                          | Today’s date                                                                         |  |
|                                                                          | Weekday                                                                              |  |
|                                                                          | Current year                                                                         |  |
|                                                                          | Current time (within 1 hour)                                                         |  |
| <b>IMMEDIATE MEMORY</b>                                                  | Repeat as many words as possible from a read list                                    |  |
| <b>CONCENTRATION – Digits backwards</b>                                  | Repeat a string of numbers                                                           |  |
|                                                                          | Repeat a string of numbers in reverse order                                          |  |
| <b>MONTHS IN REVERSE ORDER</b>                                           | Tell the months of the year in reverse order                                         |  |
| <b>STEP 4 NEUROLOGICAL SCREEN</b>                                        | Read out loud and follow instructions without difficulty                             |  |
|                                                                          | Full range of pain-free PASSIVE cervical spine movement                              |  |
|                                                                          | (fixed head) Look side-to-side and up-and-down                                       |  |

|                                                       |                                                                         |                        |
|-------------------------------------------------------|-------------------------------------------------------------------------|------------------------|
|                                                       | Perform finger nose coordination test normally                          |                        |
|                                                       | Perform tandem gait normally                                            |                        |
| <b>BALANCE EXAMINATION</b>                            | Double leg stance                                                       | Test in day prosthetic |
| Modified Balance Error Scoring System (mBESS) testing | Single leg stance (non-dominant foot)                                   | Test in day prosthetic |
|                                                       | Tandem stance (non-dominant foot at back)                               | Test in day prosthetic |
| <b>STEP 5 DELAYED RECALL</b>                          | Repeat as many words as possible from the previously read list (step 3) |                        |

Green shading: no anticipated additional considerations for Para athletes; Yellow shading: potential additional considerations for some Para athletes (dependent on the level or nature of athlete impairment); Red shading: items from the SCAT5 that should not be used for Para athletes

## Considerations and usability of the 5th edition of the Sport Concussion Assessment Tool (SCAT5) for the office or off-field assessment in athletes with (bilateral) lower limb deficiency

|                                                                          |                                                          |                             |
|--------------------------------------------------------------------------|----------------------------------------------------------|-----------------------------|
| <b>STEP 1 ATHLETE BACKGROUND</b>                                         | Hospitalization for a head injury?                       |                             |
|                                                                          | Headache disorder or migraines?                          |                             |
|                                                                          | Learning disability / dyslexia?                          |                             |
|                                                                          | ADD / ADHD?                                              |                             |
|                                                                          | Depression, anxiety or other psychiatric disorder?       |                             |
| <b>STEP 2 SYMPTOM EVALUATION</b>                                         | Headache                                                 |                             |
|                                                                          | “Pressure in head”                                       |                             |
|                                                                          | Neck pain                                                |                             |
|                                                                          | Nausea or vomiting                                       |                             |
|                                                                          | Dizziness                                                |                             |
|                                                                          | Blurred vision                                           |                             |
|                                                                          | Balance problems                                         | Consider looking for change |
|                                                                          | Sensitivity to light                                     |                             |
|                                                                          | Sensitivity to noise                                     |                             |
|                                                                          | Feeling slowed down                                      |                             |
|                                                                          | Feeling like “in a fog”                                  |                             |
|                                                                          | “Don’t feel right”                                       |                             |
|                                                                          | Difficulty concentrating                                 |                             |
|                                                                          | Difficulty remembering                                   |                             |
|                                                                          | Fatigue or low energy                                    |                             |
|                                                                          | Confusion                                                |                             |
|                                                                          | Drowsiness                                               |                             |
|                                                                          | More emotional                                           |                             |
|                                                                          | Irritability                                             |                             |
|                                                                          | Sadness                                                  |                             |
|                                                                          | Nervous or anxious                                       |                             |
|                                                                          | Trouble falling asleep                                   |                             |
|                                                                          | Symptoms get worse with physical activity?               |                             |
| Symptoms get worse with mental activity?                                 |                                                          |                             |
| If 100% is feeling perfectly normal, what percent of normal do you feel? |                                                          |                             |
| <b>STEP 3 COGNITIVE SCREENING</b>                                        |                                                          |                             |
| <b>ORIENTATION</b>                                                       | Month                                                    |                             |
|                                                                          | Today’s date                                             |                             |
|                                                                          | Weekday                                                  |                             |
|                                                                          | Current year                                             |                             |
|                                                                          | Current time (within 1 hour)                             |                             |
| <b>IMMEDIATE MEMORY</b>                                                  | Repeat as many words as possible from a read list        |                             |
| <b>CONCENTRATION – Digits backwards</b>                                  | Repeat a string of numbers                               |                             |
|                                                                          | Repeat a string of numbers in reverse order              |                             |
| <b>MONTHS IN REVERSE ORDER</b>                                           | Tell the months of the year in reverse order             |                             |
| <b>STEP 4 NEUROLOGICAL SCREEN</b>                                        | Read out loud and follow instructions without difficulty |                             |
|                                                                          | Full range of pain-free PASSIVE cervical spine movement  |                             |
|                                                                          | (fixed head) Look side-to-side and up-and-down           |                             |

|                                                       |                                                                         |                                         |
|-------------------------------------------------------|-------------------------------------------------------------------------|-----------------------------------------|
|                                                       | Perform finger nose coordination test normally                          |                                         |
|                                                       | Perform tandem gait normally                                            |                                         |
| <b>BALANCE EXAMINATION</b>                            | Double leg stance                                                       | Test in day prosthetic or no prosthetic |
| Modified Balance Error Scoring System (mBESS) testing | Single leg stance (non-dominant foot)                                   | Test in day prosthetic or no prosthetic |
|                                                       | Tandem stance (non-dominant foot at back)                               | Test in day prosthetic or no prosthetic |
| <b>STEP 5 DELAYED RECALL</b>                          | Repeat as many words as possible from the previously read list (step 3) |                                         |

Green shading: no anticipated additional considerations for Para athletes; Yellow shading: potential additional considerations for some Para athletes (dependent on the level or nature of athlete impairment); Red shading: items from the SCAT5 that should not be used for Para athletes



## Considerations and usability of the 5th edition of the Sport Concussion Assessment Tool (SCAT5) for the office or off-field assessment in athletes with impaired vision

|                                                                                                                                                                             |                                                          |                                   |
|-----------------------------------------------------------------------------------------------------------------------------------------------------------------------------|----------------------------------------------------------|-----------------------------------|
| <b>STEP 1 ATHLETE BACKGROUND</b>                                                                                                                                            | Hospitalization for a head injury?                       | Green                             |
|                                                                                                                                                                             | Headache disorder or migraines?                          | Green                             |
|                                                                                                                                                                             | Learning disability / dyslexia?                          | Green                             |
|                                                                                                                                                                             | ADD / ADHD?                                              | Green                             |
|                                                                                                                                                                             | Depression, anxiety or other psychiatric disorder?       | Green                             |
| <b>STEP 2 SYMPTOM EVALUATION</b><br>The athlete should be given the symptom form and asked to read this instruction paragraph out loud, and then complete the symptom scale | Symptom form with instructions                           | Consider translator/screen reader |
|                                                                                                                                                                             | Headache                                                 | Green                             |
|                                                                                                                                                                             | "Pressure in head"                                       | Green                             |
|                                                                                                                                                                             | Neck pain                                                | Green                             |
|                                                                                                                                                                             | Nausea or vomiting                                       | Green                             |
|                                                                                                                                                                             | Dizziness                                                | Green                             |
|                                                                                                                                                                             | Blurred vision                                           | Yellow                            |
|                                                                                                                                                                             | Balance problems                                         | Yellow                            |
|                                                                                                                                                                             | Sensitivity to light                                     | Yellow                            |
|                                                                                                                                                                             | Sensitivity to noise                                     | Green                             |
|                                                                                                                                                                             | Feeling slowed down                                      | Green                             |
|                                                                                                                                                                             | Feeling like "in a fog"                                  | Green                             |
|                                                                                                                                                                             | "Don't feel right"                                       | Green                             |
|                                                                                                                                                                             | Difficulty concentrating                                 | Green                             |
|                                                                                                                                                                             | Difficulty remembering                                   | Green                             |
|                                                                                                                                                                             | Fatigue or low energy                                    | Green                             |
|                                                                                                                                                                             | Confusion                                                | Green                             |
|                                                                                                                                                                             | Drowsiness                                               | Green                             |
|                                                                                                                                                                             | More emotional                                           | Green                             |
|                                                                                                                                                                             | Irritability                                             | Green                             |
| Sadness                                                                                                                                                                     | Green                                                    |                                   |
| Nervous or anxious                                                                                                                                                          | Green                                                    |                                   |
| Trouble falling asleep                                                                                                                                                      | Green                                                    |                                   |
| Symptoms get worse with physical activity?                                                                                                                                  | Green                                                    |                                   |
| Symptoms get worse with mental activity?                                                                                                                                    | Green                                                    |                                   |
| If 100% is feeling perfectly normal, what percent of normal do you feel?                                                                                                    | Green                                                    |                                   |
| <b>STEP 3 COGNITIVE SCREENING</b>                                                                                                                                           |                                                          |                                   |
| <b>ORIENTATION</b>                                                                                                                                                          | Month                                                    | Green                             |
|                                                                                                                                                                             | Today's date                                             | Green                             |
|                                                                                                                                                                             | Weekday                                                  | Green                             |
|                                                                                                                                                                             | Current year                                             | Green                             |
|                                                                                                                                                                             | Current time (within 1 hour)                             | Green                             |
| <b>IMMEDIATE MEMORY</b>                                                                                                                                                     | Repeat as many words as possible from a read list        | Green                             |
|                                                                                                                                                                             | Repeat a string of numbers                               | Green                             |
| <b>CONCENTRATION – Digits backwards</b>                                                                                                                                     | Repeat a string of numbers                               | Green                             |
|                                                                                                                                                                             | Repeat a string of numbers in reverse order              | Green                             |
| <b>MONTHS IN REVERSE ORDER</b>                                                                                                                                              | Tell the months of the year in reverse order             | Green                             |
| <b>STEP 4 NEUROLOGICAL SCREEN</b>                                                                                                                                           | Read out loud and follow instructions without difficulty | Red                               |
|                                                                                                                                                                             | Full range of pain-free PASSIVE cervical spine movement  | Green                             |
|                                                                                                                                                                             | (fixed head) Look side-to-side and up-and-down           | Yellow                            |

|                                                       |                                                                         |                          |
|-------------------------------------------------------|-------------------------------------------------------------------------|--------------------------|
|                                                       | Perform finger nose coordination test normally                          | Baseline may be an issue |
|                                                       | Perform tandem gait normally                                            | Baseline may be lower    |
| <b>BALANCE EXAMINATION</b>                            | Double leg stance                                                       | Baseline may be lower    |
| Modified Balance Error Scoring System (mBESS) testing | Single leg stance (non-dominant foot)                                   | Baseline may be lower    |
|                                                       | Tandem stance (non-dominant foot at back)                               | Baseline may be lower    |
| <b>STEP 5 DELAYED RECALL</b>                          | Repeat as many words as possible from the previously read list (step 3) |                          |

Green shading: no anticipated additional considerations for Para athletes; Yellow shading: potential additional considerations for some Para athletes (dependent on the level or nature of athlete impairment); Red shading: items from the SCAT5 that should not be used for Para athletes

## Considerations and usability of the 5th edition of the Sport Concussion Assessment Tool (SCAT5) for the office or off-field assessment in athletes with absent vision

|                                                                                                                                                                             |                                                          |                                   |
|-----------------------------------------------------------------------------------------------------------------------------------------------------------------------------|----------------------------------------------------------|-----------------------------------|
| <b>STEP 1 ATHLETE BACKGROUND</b>                                                                                                                                            | Hospitalization for a head injury?                       | Green                             |
|                                                                                                                                                                             | Headache disorder or migraines?                          | Green                             |
|                                                                                                                                                                             | Learning disability / dyslexia?                          | Green                             |
|                                                                                                                                                                             | ADD / ADHD?                                              | Green                             |
|                                                                                                                                                                             | Depression, anxiety or other psychiatric disorder?       | Green                             |
| <b>STEP 2 SYMPTOM EVALUATION</b><br>The athlete should be given the symptom form and asked to read this instruction paragraph out loud, and then complete the symptom scale | Symptom form with instructions                           | Consider translator/screen reader |
|                                                                                                                                                                             | Headache                                                 | Green                             |
|                                                                                                                                                                             | “Pressure in head”                                       | Green                             |
|                                                                                                                                                                             | Neck pain                                                | Green                             |
|                                                                                                                                                                             | Nausea or vomiting                                       | Green                             |
|                                                                                                                                                                             | Dizziness                                                | Green                             |
|                                                                                                                                                                             | Blurred vision                                           | Yellow                            |
|                                                                                                                                                                             | Balance problems                                         | Yellow                            |
|                                                                                                                                                                             | Sensitivity to light                                     | Yellow                            |
|                                                                                                                                                                             | Sensitivity to noise                                     | Green                             |
|                                                                                                                                                                             | Feeling slowed down                                      | Green                             |
|                                                                                                                                                                             | Feeling like “in a fog”                                  | Green                             |
|                                                                                                                                                                             | “Don’t feel right”                                       | Green                             |
|                                                                                                                                                                             | Difficulty concentrating                                 | Green                             |
|                                                                                                                                                                             | Difficulty remembering                                   | Green                             |
|                                                                                                                                                                             | Fatigue or low energy                                    | Green                             |
|                                                                                                                                                                             | Confusion                                                | Green                             |
|                                                                                                                                                                             | Drowsiness                                               | Green                             |
|                                                                                                                                                                             | More emotional                                           | Green                             |
|                                                                                                                                                                             | Irritability                                             | Green                             |
| Sadness                                                                                                                                                                     | Green                                                    |                                   |
| Nervous or anxious                                                                                                                                                          | Green                                                    |                                   |
| Trouble falling asleep                                                                                                                                                      | Yellow                                                   |                                   |
| Symptoms get worse with physical activity?                                                                                                                                  | Green                                                    |                                   |
| Symptoms get worse with mental activity?                                                                                                                                    | Green                                                    |                                   |
| If 100% is feeling perfectly normal, what percent of normal do you feel?                                                                                                    | Green                                                    |                                   |
| <b>STEP 3 COGNITIVE SCREENING</b>                                                                                                                                           |                                                          |                                   |
| <b>ORIENTATION</b>                                                                                                                                                          | Month                                                    | Green                             |
|                                                                                                                                                                             | Today’s date                                             | Green                             |
|                                                                                                                                                                             | Weekday                                                  | Green                             |
|                                                                                                                                                                             | Current year                                             | Green                             |
|                                                                                                                                                                             | Current time (within 1 hour)                             | Green                             |
| <b>IMMEDIATE MEMORY</b>                                                                                                                                                     | Repeat as many words as possible from a read list        | Green                             |
| <b>CONCENTRATION – Digits backwards</b>                                                                                                                                     | Repeat a string of numbers                               | Green                             |
|                                                                                                                                                                             | Repeat a string of numbers in reverse order              | Green                             |
| <b>MONTHS IN REVERSE ORDER</b>                                                                                                                                              | Tell the months of the year in reverse order             | Green                             |
| <b>STEP 4 NEUROLOGICAL SCREEN</b>                                                                                                                                           | Read out loud and follow instructions without difficulty | Red                               |
|                                                                                                                                                                             | Full range of pain-free PASSIVE cervical spine movement  | Green                             |
|                                                                                                                                                                             | (fixed head) Look side-to-side and up-and-down           | Red                               |

|                                                       |                                                                         |                       |
|-------------------------------------------------------|-------------------------------------------------------------------------|-----------------------|
|                                                       | Perform finger nose coordination test normally                          | Baseline may be lower |
|                                                       | Perform tandem gait normally                                            | Baseline may be lower |
| <b>BALANCE EXAMINATION</b>                            | Double leg stance                                                       | Baseline may be lower |
| Modified Balance Error Scoring System (mBESS) testing | Single leg stance (non-dominant foot)                                   | Baseline may be lower |
|                                                       | Tandem stance (non-dominant foot at back)                               | Baseline may be lower |
| <b>STEP 5 DELAYED RECALL</b>                          | Repeat as many words as possible from the previously read list (step 3) |                       |

Green shading: no anticipated additional considerations for Para athletes; Yellow shading: potential additional considerations for some Para athletes (dependent on the level or nature of athlete impairment); Red shading: items from the SCAT5 that should not be used for Para athletes

## Considerations and usability of the 5th edition of the Sport Concussion Assessment Tool (SCAT5) for the office or off-field assessment in athletes with globe absent

|                                                                                                                                                                             |                                                          |                                   |
|-----------------------------------------------------------------------------------------------------------------------------------------------------------------------------|----------------------------------------------------------|-----------------------------------|
| <b>STEP 1 ATHLETE BACKGROUND</b>                                                                                                                                            | Hospitalization for a head injury?                       | Green                             |
|                                                                                                                                                                             | Headache disorder or migraines?                          | Green                             |
|                                                                                                                                                                             | Learning disability / dyslexia?                          | Green                             |
|                                                                                                                                                                             | ADD / ADHD?                                              | Green                             |
|                                                                                                                                                                             | Depression, anxiety or other psychiatric disorder?       | Green                             |
| <b>STEP 2 SYMPTOM EVALUATION</b><br>The athlete should be given the symptom form and asked to read this instruction paragraph out loud, and then complete the symptom scale | Symptom form with instructions                           | Consider translator/screen reader |
|                                                                                                                                                                             | Headache                                                 | Green                             |
|                                                                                                                                                                             | “Pressure in head”                                       | Green                             |
|                                                                                                                                                                             | Neck pain                                                | Green                             |
|                                                                                                                                                                             | Nausea or vomiting                                       | Green                             |
|                                                                                                                                                                             | Dizziness                                                | Green                             |
|                                                                                                                                                                             | Blurred vision                                           | Yellow                            |
|                                                                                                                                                                             | Balance problems                                         | Yellow                            |
|                                                                                                                                                                             | Sensitivity to light                                     | Yellow                            |
|                                                                                                                                                                             | Sensitivity to noise                                     | Green                             |
|                                                                                                                                                                             | Feeling slowed down                                      | Green                             |
|                                                                                                                                                                             | Feeling like “in a fog”                                  | Green                             |
|                                                                                                                                                                             | “Don’t feel right”                                       | Green                             |
|                                                                                                                                                                             | Difficulty concentrating                                 | Green                             |
|                                                                                                                                                                             | Difficulty remembering                                   | Green                             |
|                                                                                                                                                                             | Fatigue or low energy                                    | Green                             |
|                                                                                                                                                                             | Confusion                                                | Green                             |
|                                                                                                                                                                             | Drowsiness                                               | Green                             |
|                                                                                                                                                                             | More emotional                                           | Green                             |
|                                                                                                                                                                             | Irritability                                             | Green                             |
| Sadness                                                                                                                                                                     | Green                                                    |                                   |
| Nervous or anxious                                                                                                                                                          | Green                                                    |                                   |
| Trouble falling asleep                                                                                                                                                      | Consider if unilateral or bilateral                      |                                   |
| Symptoms get worse with physical activity?                                                                                                                                  | Green                                                    |                                   |
| Symptoms get worse with mental activity?                                                                                                                                    | Green                                                    |                                   |
| If 100% is feeling perfectly normal, what percent of normal do you feel?                                                                                                    | Green                                                    |                                   |
| <b>STEP 3 COGNITIVE SCREENING</b>                                                                                                                                           |                                                          |                                   |
| <b>ORIENTATION</b>                                                                                                                                                          | Month                                                    | Green                             |
|                                                                                                                                                                             | Today’s date                                             | Green                             |
|                                                                                                                                                                             | Weekday                                                  | Green                             |
|                                                                                                                                                                             | Current year                                             | Green                             |
|                                                                                                                                                                             | Current time (within 1 hour)                             | Green                             |
| <b>IMMEDIATE MEMORY</b>                                                                                                                                                     | Repeat as many words as possible from a read list        | Green                             |
|                                                                                                                                                                             | Repeat a string of numbers                               | Green                             |
| <b>CONCENTRATION – Digits backwards</b>                                                                                                                                     | Repeat a string of numbers in reverse order              | Green                             |
|                                                                                                                                                                             | Tell the months of the year in reverse order             | Green                             |
| <b>MONTHS IN REVERSE ORDER</b>                                                                                                                                              |                                                          |                                   |
| <b>STEP 4 NEUROLOGICAL SCREEN</b>                                                                                                                                           | Read out loud and follow instructions without difficulty | Orange                            |
|                                                                                                                                                                             | Full range of pain-free PASSIVE cervical spine movement  | Green                             |
|                                                                                                                                                                             | (fixed head) Look side-to-side and up-and-down           | Orange                            |

|                                                       |                                                                         |                       |
|-------------------------------------------------------|-------------------------------------------------------------------------|-----------------------|
|                                                       | Perform finger nose coordination test normally                          | Baseline may be lower |
|                                                       | Perform tandem gait normally                                            | Baseline may be lower |
| <b>BALANCE EXAMINATION</b>                            | Double leg stance                                                       | Baseline may be lower |
| Modified Balance Error Scoring System (mBESS) testing | Single leg stance (non-dominant foot)                                   | Baseline may be lower |
|                                                       | Tandem stance (non-dominant foot at back)                               | Baseline may be lower |
| <b>STEP 5 DELAYED RECALL</b>                          | Repeat as many words as possible from the previously read list (step 3) |                       |

Green shading: no anticipated additional considerations for Para athletes; Yellow shading: potential additional considerations for some Para athletes (dependent on the level or nature of athlete impairment); Red shading: items from the SCAT5 that should not be used for Para athletes

## Considerations and usability of the 5th edition of the Sport Concussion Assessment Tool (SCAT5) for the office or off-field assessment in SCI athletes with quadriplegia

|                                                                                                                                                                             |                                                                                                        |                                    |
|-----------------------------------------------------------------------------------------------------------------------------------------------------------------------------|--------------------------------------------------------------------------------------------------------|------------------------------------|
| <b>STEP 1 ATHLETE BACKGROUND</b>                                                                                                                                            | Hospitalization for a head injury?                                                                     | Consider initial injury            |
|                                                                                                                                                                             | Headache disorder or migraines?                                                                        |                                    |
|                                                                                                                                                                             | Learning disability / dyslexia?                                                                        |                                    |
|                                                                                                                                                                             | ADD / ADHD?                                                                                            |                                    |
|                                                                                                                                                                             | Depression, anxiety or other psychiatric disorder?                                                     |                                    |
| <b>STEP 2 SYMPTOM EVALUATION</b><br>The athlete should be given the symptom form and asked to read this instruction paragraph out loud, and then complete the symptom scale | Symptom form with instructions                                                                         |                                    |
|                                                                                                                                                                             | Headache                                                                                               |                                    |
|                                                                                                                                                                             | "Pressure in head"                                                                                     |                                    |
|                                                                                                                                                                             | Neck pain                                                                                              |                                    |
|                                                                                                                                                                             | Nausea or vomiting                                                                                     |                                    |
|                                                                                                                                                                             | Dizziness                                                                                              |                                    |
|                                                                                                                                                                             | Blurred vision                                                                                         |                                    |
|                                                                                                                                                                             | Balance problems                                                                                       | Consider reporting sitting balance |
|                                                                                                                                                                             | Sensitivity to light                                                                                   |                                    |
|                                                                                                                                                                             | Sensitivity to noise                                                                                   |                                    |
|                                                                                                                                                                             | Feeling slowed down                                                                                    |                                    |
|                                                                                                                                                                             | Feeling like "in a fog"                                                                                |                                    |
|                                                                                                                                                                             | "Don't feel right"                                                                                     |                                    |
|                                                                                                                                                                             | Difficulty concentrating                                                                               |                                    |
|                                                                                                                                                                             | Difficulty remembering                                                                                 |                                    |
|                                                                                                                                                                             | Fatigue or low energy                                                                                  |                                    |
|                                                                                                                                                                             | Confusion                                                                                              |                                    |
|                                                                                                                                                                             | Drowsiness                                                                                             |                                    |
|                                                                                                                                                                             | More emotional                                                                                         |                                    |
|                                                                                                                                                                             | Irritability                                                                                           |                                    |
|                                                                                                                                                                             | Sadness                                                                                                |                                    |
|                                                                                                                                                                             | Nervous or anxious                                                                                     |                                    |
|                                                                                                                                                                             | Trouble falling asleep                                                                                 |                                    |
|                                                                                                                                                                             | Symptoms get worse with physical activity?                                                             |                                    |
|                                                                                                                                                                             | Symptoms get worse with mental activity?                                                               |                                    |
| If 100% is feeling perfectly normal, what percent of normal do you feel?                                                                                                    |                                                                                                        |                                    |
| <b>STEP 3 COGNITIVE SCREENING</b>                                                                                                                                           |                                                                                                        |                                    |
| <b>ORIENTATION</b>                                                                                                                                                          | Month                                                                                                  |                                    |
|                                                                                                                                                                             | Today's date                                                                                           |                                    |
|                                                                                                                                                                             | Weekday                                                                                                |                                    |
|                                                                                                                                                                             | Current year                                                                                           |                                    |
|                                                                                                                                                                             | Current time (within 1 hour)                                                                           |                                    |
| <b>IMMEDIATE MEMORY</b>                                                                                                                                                     | Repeat as many words as possible from a read list                                                      |                                    |
| <b>CONCENTRATION – Digits backwards</b>                                                                                                                                     | Repeat a string of numbers                                                                             |                                    |
|                                                                                                                                                                             | Repeat a string of numbers in reverse order                                                            |                                    |
| <b>MONTHS IN REVERSE ORDER</b>                                                                                                                                              | Tell the months of the year in reverse order                                                           |                                    |
| <b>STEP 4 NEUROLOGICAL SCREEN</b>                                                                                                                                           | Read out loud and follow instructions without difficulty                                               |                                    |
|                                                                                                                                                                             | Full range of pain-free PASSIVE cervical spine movement (fixed head) Look side-to-side and up-and-down | Comparative to baseline            |
|                                                                                                                                                                             |                                                                                                        |                                    |

|                                                       |                                                                         |                               |
|-------------------------------------------------------|-------------------------------------------------------------------------|-------------------------------|
|                                                       | Perform finger nose coordination test normally                          | Hand function may be affected |
|                                                       | Perform tandem gait normally                                            |                               |
| <b>BALANCE EXAMINATION</b>                            | Double leg stance                                                       |                               |
| Modified Balance Error Scoring System (mBESS) testing | Single leg stance (non-dominant foot)                                   |                               |
|                                                       | Tandem stance (non-dominant foot at back)                               |                               |
| <b>STEP 5 DELAYED RECALL</b>                          | Repeat as many words as possible from the previously read list (step 3) |                               |

Green shading: no anticipated additional considerations for Para athletes; Yellow shading: potential additional considerations for some Para athletes (dependent on the level or nature of athlete impairment); Red shading: items from the SCAT5 that should not be used for Para athletes



## Considerations and usability of the 5th edition of the Sport Concussion Assessment Tool (SCAT5) for the office or off-field assessment in SCI athletes with paraplegia

|                                                                                                                                                                             |                                                          |                                    |
|-----------------------------------------------------------------------------------------------------------------------------------------------------------------------------|----------------------------------------------------------|------------------------------------|
| <b>STEP 1 ATHLETE BACKGROUND</b>                                                                                                                                            | Hospitalization for a head injury?                       | Consider initial injury            |
|                                                                                                                                                                             | Headache disorder or migraines?                          |                                    |
|                                                                                                                                                                             | Learning disability / dyslexia?                          |                                    |
|                                                                                                                                                                             | ADD / ADHD?                                              |                                    |
|                                                                                                                                                                             | Depression, anxiety or other psychiatric disorder?       |                                    |
| <b>STEP 2 SYMPTOM EVALUATION</b><br>The athlete should be given the symptom form and asked to read this instruction paragraph out loud, and then complete the symptom scale | Symptom form with instructions                           |                                    |
|                                                                                                                                                                             | Headache                                                 |                                    |
|                                                                                                                                                                             | “Pressure in head”                                       |                                    |
|                                                                                                                                                                             | Neck pain                                                |                                    |
|                                                                                                                                                                             | Nausea or vomiting                                       |                                    |
|                                                                                                                                                                             | Dizziness                                                |                                    |
|                                                                                                                                                                             | Blurred vision                                           |                                    |
|                                                                                                                                                                             | Balance problems                                         | Consider reporting sitting balance |
|                                                                                                                                                                             | Sensitivity to light                                     |                                    |
|                                                                                                                                                                             | Sensitivity to noise                                     |                                    |
|                                                                                                                                                                             | Feeling slowed down                                      |                                    |
|                                                                                                                                                                             | Feeling like “in a fog”                                  |                                    |
|                                                                                                                                                                             | “Don’t feel right”                                       |                                    |
|                                                                                                                                                                             | Difficulty concentrating                                 |                                    |
|                                                                                                                                                                             | Difficulty remembering                                   |                                    |
|                                                                                                                                                                             | Fatigue or low energy                                    |                                    |
|                                                                                                                                                                             | Confusion                                                |                                    |
|                                                                                                                                                                             | Drowsiness                                               |                                    |
|                                                                                                                                                                             | More emotional                                           |                                    |
|                                                                                                                                                                             | Irritability                                             |                                    |
|                                                                                                                                                                             | Sadness                                                  |                                    |
|                                                                                                                                                                             | Nervous or anxious                                       |                                    |
|                                                                                                                                                                             | Trouble falling asleep                                   |                                    |
| Symptoms get worse with physical activity?                                                                                                                                  |                                                          |                                    |
| Symptoms get worse with mental activity?                                                                                                                                    |                                                          |                                    |
| If 100% is feeling perfectly normal, what percent of normal do you feel?                                                                                                    |                                                          |                                    |
| <b>STEP 3 COGNITIVE SCREENING</b>                                                                                                                                           |                                                          |                                    |
| <b>ORIENTATION</b>                                                                                                                                                          | Month                                                    |                                    |
|                                                                                                                                                                             | Today’s date                                             |                                    |
|                                                                                                                                                                             | Weekday                                                  |                                    |
|                                                                                                                                                                             | Current year                                             |                                    |
|                                                                                                                                                                             | Current time (within 1 hour)                             |                                    |
| <b>IMMEDIATE MEMORY</b>                                                                                                                                                     | Repeat as many words as possible from a read list        |                                    |
| <b>CONCENTRATION – Digits backwards</b>                                                                                                                                     | Repeat a string of numbers                               |                                    |
|                                                                                                                                                                             | Repeat a string of numbers in reverse order              |                                    |
| <b>MONTHS IN REVERSE ORDER</b>                                                                                                                                              | Tell the months of the year in reverse order             |                                    |
| <b>STEP 4 NEUROLOGICAL SCREEN</b>                                                                                                                                           | Read out loud and follow instructions without difficulty |                                    |
|                                                                                                                                                                             | Full range of pain-free PASSIVE cervical spine movement  |                                    |
|                                                                                                                                                                             | (fixed head) Look side-to-side and up-and-down           |                                    |

|                                                       |                                                                         |  |
|-------------------------------------------------------|-------------------------------------------------------------------------|--|
|                                                       | Perform finger nose coordination test normally                          |  |
|                                                       | Perform tandem gait normally                                            |  |
| <b>BALANCE EXAMINATION</b>                            | Double leg stance                                                       |  |
| Modified Balance Error Scoring System (mBESS) testing | Single leg stance (non-dominant foot)                                   |  |
|                                                       | Tandem stance (non-dominant foot at back)                               |  |
| <b>STEP 5 DELAYED RECALL</b>                          | Repeat as many words as possible from the previously read list (step 3) |  |

Green shading: no anticipated additional considerations for Para athletes; Yellow shading: potential additional considerations for some Para athletes (dependent on the level or nature of athlete impairment); Red shading: items from the SCAT5 that should not be used for Para athletes

## Considerations and usability of the 5th edition of the Sport Concussion Assessment Tool (SCAT5) for the office or off-field assessment in Cerebral Palsy athletes with spastic diplegia

|                                                                                                                                                                             |                                                          |                                                                   |
|-----------------------------------------------------------------------------------------------------------------------------------------------------------------------------|----------------------------------------------------------|-------------------------------------------------------------------|
| <b>STEP 1 ATHLETE BACKGROUND</b>                                                                                                                                            | Hospitalization for a head injury?                       |                                                                   |
|                                                                                                                                                                             | Headache disorder or migraines?                          |                                                                   |
|                                                                                                                                                                             | Learning disability / dyslexia?                          | Increased risk                                                    |
|                                                                                                                                                                             | ADD / ADHD?                                              | Increased risk                                                    |
|                                                                                                                                                                             | Depression, anxiety or other psychiatric disorder?       |                                                                   |
| <b>STEP 2 SYMPTOM EVALUATION</b><br>The athlete should be given the symptom form and asked to read this instruction paragraph out loud, and then complete the symptom scale | Symptom form with instructions                           | Consider if accompanying person required/modify descriptive words |
|                                                                                                                                                                             | Headache                                                 |                                                                   |
|                                                                                                                                                                             | “Pressure in head”                                       |                                                                   |
|                                                                                                                                                                             | Neck pain                                                | Consider baseline                                                 |
|                                                                                                                                                                             | Nausea or vomiting                                       |                                                                   |
|                                                                                                                                                                             | Dizziness                                                |                                                                   |
|                                                                                                                                                                             | Blurred vision                                           | Increased risk                                                    |
|                                                                                                                                                                             | Balance problems                                         |                                                                   |
|                                                                                                                                                                             | Sensitivity to light                                     |                                                                   |
|                                                                                                                                                                             | Sensitivity to noise                                     |                                                                   |
|                                                                                                                                                                             | Feeling slowed down                                      |                                                                   |
|                                                                                                                                                                             | Feeling like “in a fog”                                  |                                                                   |
|                                                                                                                                                                             | “Don’t feel right”                                       |                                                                   |
|                                                                                                                                                                             | Difficulty concentrating                                 | Reflect on values over time                                       |
|                                                                                                                                                                             | Difficulty remembering                                   | Reflect on values over time                                       |
|                                                                                                                                                                             | Fatigue or low energy                                    |                                                                   |
|                                                                                                                                                                             | Confusion                                                |                                                                   |
|                                                                                                                                                                             | Drowsiness                                               |                                                                   |
|                                                                                                                                                                             | More emotional                                           |                                                                   |
|                                                                                                                                                                             | Irritability                                             |                                                                   |
|                                                                                                                                                                             | Sadness                                                  |                                                                   |
| Nervous or anxious                                                                                                                                                          |                                                          |                                                                   |
| Trouble falling asleep                                                                                                                                                      |                                                          |                                                                   |
| Symptoms get worse with physical activity?                                                                                                                                  |                                                          |                                                                   |
| Symptoms get worse with mental activity?                                                                                                                                    |                                                          |                                                                   |
| If 100% is feeling perfectly normal, what percent of normal do you feel?                                                                                                    |                                                          |                                                                   |
| <b>STEP 3 COGNITIVE SCREENING</b>                                                                                                                                           |                                                          |                                                                   |
| <b>ORIENTATION</b>                                                                                                                                                          | Month                                                    |                                                                   |
|                                                                                                                                                                             | Today’s date                                             |                                                                   |
|                                                                                                                                                                             | Weekday                                                  |                                                                   |
|                                                                                                                                                                             | Current year                                             |                                                                   |
|                                                                                                                                                                             | Current time (within 1 hour)                             |                                                                   |
| <b>IMMEDIATE MEMORY</b>                                                                                                                                                     | Repeat as many words as possible from a read list        | Can tester interpret/LD association                               |
| <b>CONCENTRATION – Digits backwards</b>                                                                                                                                     | Repeat a string of numbers                               | Can tester interpret/LD association                               |
|                                                                                                                                                                             | Repeat a string of numbers in reverse order              | Can tester interpret/LD association                               |
| <b>MONTHS IN REVERSE ORDER</b>                                                                                                                                              | Tell the months of the year in reverse order             | Can tester interpret/LD association                               |
| <b>STEP 4 NEUROLOGICAL SCREEN</b>                                                                                                                                           | Read out loud and follow instructions without difficulty | Increased risk                                                    |
|                                                                                                                                                                             | Full range of pain-free PASSIVE cervical spine movement  | Comparative to baseline                                           |

|                                                       |                                                                         |                                               |
|-------------------------------------------------------|-------------------------------------------------------------------------|-----------------------------------------------|
|                                                       | (fixed head) Look side-to-side and up-and-down                          |                                               |
|                                                       | Perform finger nose coordination test normally                          | Hand function may be affected                 |
|                                                       | Perform tandem gait normally                                            | Leg function may be affected                  |
| <b>BALANCE EXAMINATION</b>                            | Double leg stance                                                       |                                               |
| Modified Balance Error Scoring System (mBESS) testing | Single leg stance (non-dominant foot)                                   |                                               |
|                                                       | Tandem stance (non-dominant foot at back)                               |                                               |
| <b>STEP 5 DELAYED RECALL</b>                          | Repeat as many words as possible from the previously read list (step 3) | Consider association with learning disability |

Green shading: no anticipated additional considerations for Para athletes; Yellow shading: potential additional considerations for some Para athletes (dependent on the level or nature of athlete impairment); Red shading: items from the SCAT5 that should not be used for Para athletes

## Considerations and usability of the 5th edition of the Sport Concussion Assessment Tool (SCAT5) for the office or off-field assessment in Cerebral Palsy athletes with spastic hemiplegia

|                                                                                                                                                                             |                                                          |                                                                   |
|-----------------------------------------------------------------------------------------------------------------------------------------------------------------------------|----------------------------------------------------------|-------------------------------------------------------------------|
| <b>STEP 1 ATHLETE BACKGROUND</b>                                                                                                                                            | Hospitalization for a head injury?                       |                                                                   |
|                                                                                                                                                                             | Headache disorder or migraines?                          |                                                                   |
|                                                                                                                                                                             | Learning disability / dyslexia?                          | Increased risk                                                    |
|                                                                                                                                                                             | ADD / ADHD?                                              | Increased risk                                                    |
|                                                                                                                                                                             | Depression, anxiety or other psychiatric disorder?       |                                                                   |
| <b>STEP 2 SYMPTOM EVALUATION</b><br>The athlete should be given the symptom form and asked to read this instruction paragraph out loud, and then complete the symptom scale | Symptom form with instructions                           | Consider if accompanying person required/modify descriptive words |
|                                                                                                                                                                             | Headache                                                 |                                                                   |
|                                                                                                                                                                             | “Pressure in head”                                       |                                                                   |
|                                                                                                                                                                             | Neck pain                                                | Consider baseline                                                 |
|                                                                                                                                                                             | Nausea or vomiting                                       |                                                                   |
|                                                                                                                                                                             | Dizziness                                                |                                                                   |
|                                                                                                                                                                             | Blurred vision                                           | Increased risk                                                    |
|                                                                                                                                                                             | Balance problems                                         |                                                                   |
|                                                                                                                                                                             | Sensitivity to light                                     |                                                                   |
|                                                                                                                                                                             | Sensitivity to noise                                     |                                                                   |
|                                                                                                                                                                             | Feeling slowed down                                      |                                                                   |
|                                                                                                                                                                             | Feeling like “in a fog”                                  |                                                                   |
|                                                                                                                                                                             | “Don’t feel right”                                       |                                                                   |
|                                                                                                                                                                             | Difficulty concentrating                                 | Reflect on values over time                                       |
|                                                                                                                                                                             | Difficulty remembering                                   | Reflect on values over time                                       |
|                                                                                                                                                                             | Fatigue or low energy                                    |                                                                   |
|                                                                                                                                                                             | Confusion                                                |                                                                   |
|                                                                                                                                                                             | Drowsiness                                               |                                                                   |
|                                                                                                                                                                             | More emotional                                           |                                                                   |
|                                                                                                                                                                             | Irritability                                             |                                                                   |
|                                                                                                                                                                             | Sadness                                                  |                                                                   |
| Nervous or anxious                                                                                                                                                          |                                                          |                                                                   |
| Trouble falling asleep                                                                                                                                                      |                                                          |                                                                   |
| Symptoms get worse with physical activity?                                                                                                                                  |                                                          |                                                                   |
| Symptoms get worse with mental activity?                                                                                                                                    |                                                          |                                                                   |
| If 100% is feeling perfectly normal, what percent of normal do you feel?                                                                                                    |                                                          |                                                                   |
| <b>STEP 3 COGNITIVE SCREENING</b>                                                                                                                                           |                                                          |                                                                   |
| <b>ORIENTATION</b>                                                                                                                                                          | Month                                                    |                                                                   |
|                                                                                                                                                                             | Today’s date                                             |                                                                   |
|                                                                                                                                                                             | Weekday                                                  |                                                                   |
|                                                                                                                                                                             | Current year                                             |                                                                   |
|                                                                                                                                                                             | Current time (within 1 hour)                             |                                                                   |
| <b>IMMEDIATE MEMORY</b>                                                                                                                                                     | Repeat as many words as possible from a read list        | Can tester interpret/LD association                               |
| <b>CONCENTRATION – Digits backwards</b>                                                                                                                                     | Repeat a string of numbers                               | Can tester interpret/LD association                               |
|                                                                                                                                                                             | Repeat a string of numbers in reverse order              | Can tester interpret/LD association                               |
| <b>MONTHS IN REVERSE ORDER</b>                                                                                                                                              | Tell the months of the year in reverse order             | Can tester interpret/LD association                               |
| <b>STEP 4 NEUROLOGICAL SCREEN</b>                                                                                                                                           | Read out loud and follow instructions without difficulty | Increased risk                                                    |
|                                                                                                                                                                             | Full range of pain-free PASSIVE cervical spine movement  | Comparative to baseline                                           |

|                                                       |                                                                         |                                                  |
|-------------------------------------------------------|-------------------------------------------------------------------------|--------------------------------------------------|
|                                                       | (fixed head) Look side-to-side and up-and-down                          |                                                  |
|                                                       | Perform finger nose coordination test normally                          | Hand function not affected if use unaffected arm |
|                                                       | Perform tandem gait normally                                            | Leg function will be affected                    |
| <b>BALANCE EXAMINATION</b>                            | Double leg stance                                                       |                                                  |
| Modified Balance Error Scoring System (mBESS) testing | Single leg stance (non-dominant foot)                                   |                                                  |
|                                                       | Tandem stance (non-dominant foot at back)                               |                                                  |
| <b>STEP 5 DELAYED RECALL</b>                          | Repeat as many words as possible from the previously read list (step 3) | Consider association with learning disability    |

Green shading: no anticipated additional considerations for Para athletes; Yellow shading: potential additional considerations for some Para athletes (dependent on the level or nature of athlete impairment); Red shading: items from the SCAT5 that should not be used for Para athletes

## Considerations and usability of the 5th edition of the Sport Concussion Assessment Tool (SCAT5) for the office or off-field assessment in Cerebral Palsy athletes with spastic quadriplegia

|                                                                                                                                                                             |                                                          |                                                                   |
|-----------------------------------------------------------------------------------------------------------------------------------------------------------------------------|----------------------------------------------------------|-------------------------------------------------------------------|
| <b>STEP 1 ATHLETE BACKGROUND</b>                                                                                                                                            | Hospitalization for a head injury?                       |                                                                   |
|                                                                                                                                                                             | Headache disorder or migraines?                          |                                                                   |
|                                                                                                                                                                             | Learning disability / dyslexia?                          | Increased risk                                                    |
|                                                                                                                                                                             | ADD / ADHD?                                              | Increased risk                                                    |
|                                                                                                                                                                             | Depression, anxiety or other psychiatric disorder?       |                                                                   |
| <b>STEP 2 SYMPTOM EVALUATION</b><br>The athlete should be given the symptom form and asked to read this instruction paragraph out loud, and then complete the symptom scale | Symptom form with instructions                           | Consider if accompanying person required/modify descriptive words |
|                                                                                                                                                                             | Headache                                                 |                                                                   |
|                                                                                                                                                                             | “Pressure in head”                                       |                                                                   |
|                                                                                                                                                                             | Neck pain                                                | Consider baseline                                                 |
|                                                                                                                                                                             | Nausea or vomiting                                       |                                                                   |
|                                                                                                                                                                             | Dizziness                                                |                                                                   |
|                                                                                                                                                                             | Blurred vision                                           | Increased risk                                                    |
|                                                                                                                                                                             | Balance problems                                         |                                                                   |
|                                                                                                                                                                             | Sensitivity to light                                     |                                                                   |
|                                                                                                                                                                             | Sensitivity to noise                                     |                                                                   |
|                                                                                                                                                                             | Feeling slowed down                                      |                                                                   |
|                                                                                                                                                                             | Feeling like “in a fog”                                  |                                                                   |
|                                                                                                                                                                             | “Don’t feel right”                                       |                                                                   |
|                                                                                                                                                                             | Difficulty concentrating                                 | Reflect on values over time                                       |
|                                                                                                                                                                             | Difficulty remembering                                   | Reflect on values over time                                       |
|                                                                                                                                                                             | Fatigue or low energy                                    |                                                                   |
|                                                                                                                                                                             | Confusion                                                |                                                                   |
|                                                                                                                                                                             | Drowsiness                                               |                                                                   |
|                                                                                                                                                                             | More emotional                                           |                                                                   |
|                                                                                                                                                                             | Irritability                                             |                                                                   |
|                                                                                                                                                                             | Sadness                                                  |                                                                   |
| Nervous or anxious                                                                                                                                                          |                                                          |                                                                   |
| Trouble falling asleep                                                                                                                                                      |                                                          |                                                                   |
| Symptoms get worse with physical activity?                                                                                                                                  |                                                          |                                                                   |
| Symptoms get worse with mental activity?                                                                                                                                    |                                                          |                                                                   |
| If 100% is feeling perfectly normal, what percent of normal do you feel?                                                                                                    |                                                          |                                                                   |
| <b>STEP 3 COGNITIVE SCREENING</b>                                                                                                                                           |                                                          |                                                                   |
| <b>ORIENTATION</b>                                                                                                                                                          | Month                                                    |                                                                   |
|                                                                                                                                                                             | Today’s date                                             |                                                                   |
|                                                                                                                                                                             | Weekday                                                  |                                                                   |
|                                                                                                                                                                             | Current year                                             |                                                                   |
|                                                                                                                                                                             | Current time (within 1 hour)                             |                                                                   |
| <b>IMMEDIATE MEMORY</b>                                                                                                                                                     | Repeat as many words as possible from a read list        | Can tester interpret/LD association                               |
| <b>CONCENTRATION – Digits backwards</b>                                                                                                                                     | Repeat a string of numbers                               | Can tester interpret/LD association                               |
|                                                                                                                                                                             | Repeat a string of numbers in reverse order              | Can tester interpret/LD association                               |
| <b>MONTHS IN REVERSE ORDER</b>                                                                                                                                              | Tell the months of the year in reverse order             | Can tester interpret/LD association                               |
| <b>STEP 4 NEUROLOGICAL SCREEN</b>                                                                                                                                           | Read out loud and follow instructions without difficulty | Increased risk                                                    |
|                                                                                                                                                                             | Full range of pain-free PASSIVE cervical spine movement  | Comparative to baseline                                           |

|                                                       |                                                                         |                                               |
|-------------------------------------------------------|-------------------------------------------------------------------------|-----------------------------------------------|
|                                                       | (fixed head) Look side-to-side and up-and-down                          |                                               |
|                                                       | Perform finger nose coordination test normally                          | Hand function may be affected                 |
|                                                       | Perform tandem gait normally                                            | Leg function will be affected                 |
| <b>BALANCE EXAMINATION</b>                            | Double leg stance                                                       |                                               |
| Modified Balance Error Scoring System (mBESS) testing | Single leg stance (non-dominant foot)                                   |                                               |
|                                                       | Tandem stance (non-dominant foot at back)                               |                                               |
| <b>STEP 5 DELAYED RECALL</b>                          | Repeat as many words as possible from the previously read list (step 3) | Consider association with learning disability |

Green shading: no anticipated additional considerations for Para athletes; Yellow shading: potential additional considerations for some Para athletes (dependent on the level or nature of athlete impairment); Red shading: items from the SCAT5 that should not be used for Para athletes



## Considerations and usability of the 5th edition of the Sport Concussion Assessment Tool (SCAT5) for the office or off-field assessment in Cerebral Palsy athletes with dyskinetic cerebral palsy

|                                                                                                                                                                             |                                                          |                                                                   |
|-----------------------------------------------------------------------------------------------------------------------------------------------------------------------------|----------------------------------------------------------|-------------------------------------------------------------------|
| <b>STEP 1 ATHLETE BACKGROUND</b>                                                                                                                                            | Hospitalization for a head injury?                       |                                                                   |
|                                                                                                                                                                             | Headache disorder or migraines?                          |                                                                   |
|                                                                                                                                                                             | Learning disability / dyslexia?                          | Increased risk                                                    |
|                                                                                                                                                                             | ADD / ADHD?                                              | Increased risk                                                    |
|                                                                                                                                                                             | Depression, anxiety or other psychiatric disorder?       |                                                                   |
| <b>STEP 2 SYMPTOM EVALUATION</b><br>The athlete should be given the symptom form and asked to read this instruction paragraph out loud, and then complete the symptom scale | Symptom form with instructions                           | Consider if accompanying person required/modify descriptive words |
|                                                                                                                                                                             | Headache                                                 |                                                                   |
|                                                                                                                                                                             | “Pressure in head”                                       |                                                                   |
|                                                                                                                                                                             | Neck pain                                                | Consider baseline                                                 |
|                                                                                                                                                                             | Nausea or vomiting                                       |                                                                   |
|                                                                                                                                                                             | Dizziness                                                |                                                                   |
|                                                                                                                                                                             | Blurred vision                                           | Increased risk                                                    |
|                                                                                                                                                                             | Balance problems                                         |                                                                   |
|                                                                                                                                                                             | Sensitivity to light                                     |                                                                   |
|                                                                                                                                                                             | Sensitivity to noise                                     |                                                                   |
|                                                                                                                                                                             | Feeling slowed down                                      |                                                                   |
|                                                                                                                                                                             | Feeling like “in a fog”                                  |                                                                   |
|                                                                                                                                                                             | “Don’t feel right”                                       |                                                                   |
|                                                                                                                                                                             | Difficulty concentrating                                 | Reflect on values over time                                       |
|                                                                                                                                                                             | Difficulty remembering                                   | Reflect on values over time                                       |
|                                                                                                                                                                             | Fatigue or low energy                                    |                                                                   |
|                                                                                                                                                                             | Confusion                                                |                                                                   |
|                                                                                                                                                                             | Drowsiness                                               |                                                                   |
|                                                                                                                                                                             | More emotional                                           |                                                                   |
|                                                                                                                                                                             | Irritability                                             |                                                                   |
|                                                                                                                                                                             | Sadness                                                  |                                                                   |
| Nervous or anxious                                                                                                                                                          |                                                          |                                                                   |
| Trouble falling asleep                                                                                                                                                      |                                                          |                                                                   |
| Symptoms get worse with physical activity?                                                                                                                                  |                                                          |                                                                   |
| Symptoms get worse with mental activity?                                                                                                                                    |                                                          |                                                                   |
| If 100% is feeling perfectly normal, what percent of normal do you feel?                                                                                                    |                                                          |                                                                   |
| <b>STEP 3 COGNITIVE SCREENING</b>                                                                                                                                           |                                                          |                                                                   |
| <b>ORIENTATION</b>                                                                                                                                                          | Month                                                    | Can tester interpret/LD association                               |
|                                                                                                                                                                             | Today’s date                                             | Can tester interpret/LD association                               |
|                                                                                                                                                                             | Weekday                                                  | Can tester interpret/LD association                               |
|                                                                                                                                                                             | Current year                                             | Can tester interpret/LD association                               |
|                                                                                                                                                                             | Current time (within 1 hour)                             | Can tester interpret/LD association                               |
| <b>IMMEDIATE MEMORY</b>                                                                                                                                                     | Repeat as many words as possible from a read list        | Can tester interpret/LD association                               |
| <b>CONCENTRATION – Digits backwards</b>                                                                                                                                     | Repeat a string of numbers                               | Can tester interpret/LD association                               |
|                                                                                                                                                                             | Repeat a string of numbers in reverse order              | Can tester interpret/LD association                               |
| <b>MONTHS IN REVERSE ORDER</b>                                                                                                                                              | Tell the months of the year in reverse order             | Can tester interpret/LD association                               |
| <b>STEP 4 NEUROLOGICAL SCREEN</b>                                                                                                                                           | Read out loud and follow instructions without difficulty | Increased risk                                                    |
|                                                                                                                                                                             | Full range of pain-free PASSIVE cervical spine movement  | Comparative to baseline                                           |

|                                                       |                                                                         |                                               |
|-------------------------------------------------------|-------------------------------------------------------------------------|-----------------------------------------------|
|                                                       | (fixed head) Look side-to-side and up-and-down                          |                                               |
|                                                       | Perform finger nose coordination test normally                          | Hand function may be affected                 |
|                                                       | Perform tandem gait normally                                            | Leg function will be affected                 |
| <b>BALANCE EXAMINATION</b>                            | Double leg stance                                                       |                                               |
| Modified Balance Error Scoring System (mBESS) testing | Single leg stance (non-dominant foot)                                   |                                               |
|                                                       | Tandem stance (non-dominant foot at back)                               |                                               |
| <b>STEP 5 DELAYED RECALL</b>                          | Repeat as many words as possible from the previously read list (step 3) | Consider association with learning disability |

Green shading: no anticipated additional considerations for Para athletes; Yellow shading: potential additional considerations for some Para athletes (dependent on the level or nature of athlete impairment); Red shading: items from the SCAT5 that should not be used for Para athletes

## Considerations and usability of the 5th edition of the Sport Concussion Assessment Tool (SCAT5) for the office or off-field assessment in Cerebral Palsy athletes with ataxic cerebral palsy

|                                                                                                                                                                             |                                                          |                                                                   |
|-----------------------------------------------------------------------------------------------------------------------------------------------------------------------------|----------------------------------------------------------|-------------------------------------------------------------------|
| <b>STEP 1 ATHLETE BACKGROUND</b>                                                                                                                                            | Hospitalization for a head injury?                       |                                                                   |
|                                                                                                                                                                             | Headache disorder or migraines?                          |                                                                   |
|                                                                                                                                                                             | Learning disability / dyslexia?                          | Increased risk                                                    |
|                                                                                                                                                                             | ADD / ADHD?                                              | Increased risk                                                    |
|                                                                                                                                                                             | Depression, anxiety or other psychiatric disorder?       |                                                                   |
| <b>STEP 2 SYMPTOM EVALUATION</b><br>The athlete should be given the symptom form and asked to read this instruction paragraph out loud, and then complete the symptom scale | Symptom form with instructions                           | Consider if accompanying person required/modify descriptive words |
|                                                                                                                                                                             | Headache                                                 |                                                                   |
|                                                                                                                                                                             | “Pressure in head”                                       |                                                                   |
|                                                                                                                                                                             | Neck pain                                                | Consider baseline                                                 |
|                                                                                                                                                                             | Nausea or vomiting                                       |                                                                   |
|                                                                                                                                                                             | Dizziness                                                |                                                                   |
|                                                                                                                                                                             | Blurred vision                                           | Increased risk                                                    |
|                                                                                                                                                                             | Balance problems                                         |                                                                   |
|                                                                                                                                                                             | Sensitivity to light                                     |                                                                   |
|                                                                                                                                                                             | Sensitivity to noise                                     |                                                                   |
|                                                                                                                                                                             | Feeling slowed down                                      |                                                                   |
|                                                                                                                                                                             | Feeling like “in a fog”                                  |                                                                   |
|                                                                                                                                                                             | “Don’t feel right”                                       |                                                                   |
|                                                                                                                                                                             | Difficulty concentrating                                 | Reflect on values over time                                       |
|                                                                                                                                                                             | Difficulty remembering                                   | Reflect on values over time                                       |
|                                                                                                                                                                             | Fatigue or low energy                                    |                                                                   |
|                                                                                                                                                                             | Confusion                                                |                                                                   |
|                                                                                                                                                                             | Drowsiness                                               |                                                                   |
|                                                                                                                                                                             | More emotional                                           |                                                                   |
|                                                                                                                                                                             | Irritability                                             |                                                                   |
|                                                                                                                                                                             | Sadness                                                  |                                                                   |
|                                                                                                                                                                             | Nervous or anxious                                       |                                                                   |
| Trouble falling asleep                                                                                                                                                      |                                                          |                                                                   |
| Symptoms get worse with physical activity?                                                                                                                                  |                                                          |                                                                   |
| Symptoms get worse with mental activity?                                                                                                                                    |                                                          |                                                                   |
| If 100% is feeling perfectly normal, what percent of normal do you feel?                                                                                                    |                                                          |                                                                   |
| <b>STEP 3 COGNITIVE SCREENING</b>                                                                                                                                           |                                                          |                                                                   |
| <b>ORIENTATION</b>                                                                                                                                                          | Month                                                    | Can tester interpret/LD association                               |
|                                                                                                                                                                             | Today’s date                                             | Can tester interpret/LD association                               |
|                                                                                                                                                                             | Weekday                                                  | Can tester interpret/LD association                               |
|                                                                                                                                                                             | Current year                                             | Can tester interpret/LD association                               |
|                                                                                                                                                                             | Current time (within 1 hour)                             | Can tester interpret/LD association                               |
| <b>IMMEDIATE MEMORY</b>                                                                                                                                                     | Repeat as many words as possible from a read list        | Can tester interpret/LD association                               |
| <b>CONCENTRATION – Digits backwards</b>                                                                                                                                     | Repeat a string of numbers                               | Can tester interpret/LD association                               |
|                                                                                                                                                                             | Repeat a string of numbers in reverse order              | Can tester interpret/LD association                               |
| <b>MONTHS IN REVERSE ORDER</b>                                                                                                                                              | Tell the months of the year in reverse order             | Can tester interpret/LD association                               |
| <b>STEP 4 NEUROLOGICAL SCREEN</b>                                                                                                                                           | Read out loud and follow instructions without difficulty | Increased risk                                                    |
|                                                                                                                                                                             | Full range of pain-free PASSIVE cervical spine movement  | Comparative to baseline                                           |

|                                                       |                                                                         |                                               |
|-------------------------------------------------------|-------------------------------------------------------------------------|-----------------------------------------------|
|                                                       | (fixed head) Look side-to-side and up-and-down                          |                                               |
|                                                       | Perform finger nose coordination test normally                          | Hand function may be affected                 |
|                                                       | Perform tandem gait normally                                            | Leg function will be affected                 |
| <b>BALANCE EXAMINATION</b>                            | Double leg stance                                                       |                                               |
| Modified Balance Error Scoring System (mBESS) testing | Single leg stance (non-dominant foot)                                   |                                               |
|                                                       | Tandem stance (non-dominant foot at back)                               |                                               |
| <b>STEP 5 DELAYED RECALL</b>                          | Repeat as many words as possible from the previously read list (step 3) | Consider association with learning disability |

Green shading: no anticipated additional considerations for Para athletes; Yellow shading: potential additional considerations for some Para athletes (dependent on the level or nature of athlete impairment); Red shading: items from the SCAT5 that should not be used for Para athletes

## Considerations and usability of the 5th edition of the Sport Concussion Assessment Tool (SCAT5) for the office or off-field assessment in Cerebral Palsy athletes with mixed cerebral palsy

|                                                                                                                                                                             |                                                          |                                                                   |
|-----------------------------------------------------------------------------------------------------------------------------------------------------------------------------|----------------------------------------------------------|-------------------------------------------------------------------|
| <b>STEP 1 ATHLETE BACKGROUND</b>                                                                                                                                            | Hospitalization for a head injury?                       |                                                                   |
|                                                                                                                                                                             | Headache disorder or migraines?                          |                                                                   |
|                                                                                                                                                                             | Learning disability / dyslexia?                          | Increased risk                                                    |
|                                                                                                                                                                             | ADD / ADHD?                                              | Increased risk                                                    |
|                                                                                                                                                                             | Depression, anxiety or other psychiatric disorder?       |                                                                   |
| <b>STEP 2 SYMPTOM EVALUATION</b><br>The athlete should be given the symptom form and asked to read this instruction paragraph out loud, and then complete the symptom scale | Symptom form with instructions                           | Consider if accompanying person required/modify descriptive words |
|                                                                                                                                                                             | Headache                                                 |                                                                   |
|                                                                                                                                                                             | “Pressure in head”                                       |                                                                   |
|                                                                                                                                                                             | Neck pain                                                | Consider baseline                                                 |
|                                                                                                                                                                             | Nausea or vomiting                                       |                                                                   |
|                                                                                                                                                                             | Dizziness                                                |                                                                   |
|                                                                                                                                                                             | Blurred vision                                           | Increased risk                                                    |
|                                                                                                                                                                             | Balance problems                                         |                                                                   |
|                                                                                                                                                                             | Sensitivity to light                                     |                                                                   |
|                                                                                                                                                                             | Sensitivity to noise                                     |                                                                   |
|                                                                                                                                                                             | Feeling slowed down                                      |                                                                   |
|                                                                                                                                                                             | Feeling like “in a fog”                                  |                                                                   |
|                                                                                                                                                                             | “Don’t feel right”                                       |                                                                   |
|                                                                                                                                                                             | Difficulty concentrating                                 | Reflect on values over time                                       |
|                                                                                                                                                                             | Difficulty remembering                                   | Reflect on values over time                                       |
|                                                                                                                                                                             | Fatigue or low energy                                    |                                                                   |
|                                                                                                                                                                             | Confusion                                                |                                                                   |
|                                                                                                                                                                             | Drowsiness                                               |                                                                   |
|                                                                                                                                                                             | More emotional                                           |                                                                   |
|                                                                                                                                                                             | Irritability                                             |                                                                   |
|                                                                                                                                                                             | Sadness                                                  |                                                                   |
|                                                                                                                                                                             | Nervous or anxious                                       |                                                                   |
|                                                                                                                                                                             | Trouble falling asleep                                   |                                                                   |
| Symptoms get worse with physical activity?                                                                                                                                  |                                                          |                                                                   |
| Symptoms get worse with mental activity?                                                                                                                                    |                                                          |                                                                   |
| If 100% is feeling perfectly normal, what percent of normal do you feel?                                                                                                    |                                                          |                                                                   |
| <b>STEP 3 COGNITIVE SCREENING</b>                                                                                                                                           |                                                          |                                                                   |
| <b>ORIENTATION</b>                                                                                                                                                          | Month                                                    | Can tester interpret/LD association                               |
|                                                                                                                                                                             | Today’s date                                             | Can tester interpret/LD association                               |
|                                                                                                                                                                             | Weekday                                                  | Can tester interpret/LD association                               |
|                                                                                                                                                                             | Current year                                             | Can tester interpret/LD association                               |
|                                                                                                                                                                             | Current time (within 1 hour)                             | Can tester interpret/LD association                               |
| <b>IMMEDIATE MEMORY</b>                                                                                                                                                     | Repeat as many words as possible from a read list        | Can tester interpret/LD association                               |
| <b>CONCENTRATION – Digits backwards</b>                                                                                                                                     | Repeat a string of numbers                               | Can tester interpret/LD association                               |
|                                                                                                                                                                             | Repeat a string of numbers in reverse order              | Can tester interpret/LD association                               |
| <b>MONTHS IN REVERSE ORDER</b>                                                                                                                                              | Tell the months of the year in reverse order             | Can tester interpret/LD association                               |
| <b>STEP 4 NEUROLOGICAL SCREEN</b>                                                                                                                                           | Read out loud and follow instructions without difficulty | Increased risk                                                    |
|                                                                                                                                                                             | Full range of pain-free PASSIVE cervical spine movement  | Comparative to baseline                                           |

|                                                       |                                                                         |                                               |
|-------------------------------------------------------|-------------------------------------------------------------------------|-----------------------------------------------|
|                                                       | (fixed head) Look side-to-side and up-and-down                          |                                               |
|                                                       | Perform finger nose coordination test normally                          | Hand function may be affected                 |
|                                                       | Perform tandem gait normally                                            | Leg function will be affected                 |
| <b>BALANCE EXAMINATION</b>                            | Double leg stance                                                       |                                               |
| Modified Balance Error Scoring System (mBESS) testing | Single leg stance (non-dominant foot)                                   |                                               |
|                                                       | Tandem stance (non-dominant foot at back)                               |                                               |
| <b>STEP 5 DELAYED RECALL</b>                          | Repeat as many words as possible from the previously read list (step 3) | Consider association with learning disability |

Green shading: no anticipated additional considerations for Para athletes; Yellow shading: potential additional considerations for some Para athletes (dependent on the level or nature of athlete impairment); Red shading: items from the SCAT5 that should not be used for Para athletes

## Considerations and usability of the 5th edition of the Sport Concussion Assessment Tool (SCAT5) for the office or off-field assessment in athletes with intellectual impairment

|                                                                                                                                                                             |                                                                          |                                                                   |
|-----------------------------------------------------------------------------------------------------------------------------------------------------------------------------|--------------------------------------------------------------------------|-------------------------------------------------------------------|
| <b>STEP 1 ATHLETE BACKGROUND</b>                                                                                                                                            | Hospitalization for a head injury?                                       |                                                                   |
|                                                                                                                                                                             | Headache disorder or migraines?                                          |                                                                   |
|                                                                                                                                                                             | Learning disability / dyslexia?                                          |                                                                   |
|                                                                                                                                                                             | ADD / ADHD?                                                              |                                                                   |
|                                                                                                                                                                             | Depression, anxiety or other psychiatric disorder?                       |                                                                   |
| <b>STEP 2 SYMPTOM EVALUATION</b><br>The athlete should be given the symptom form and asked to read this instruction paragraph out loud, and then complete the symptom scale | Symptom form with instructions                                           | Consider if accompanying person required/modify descriptive words |
|                                                                                                                                                                             | Headache                                                                 |                                                                   |
|                                                                                                                                                                             | “Pressure in head”                                                       |                                                                   |
|                                                                                                                                                                             | Neck pain                                                                |                                                                   |
|                                                                                                                                                                             | Nausea or vomiting                                                       |                                                                   |
|                                                                                                                                                                             | Dizziness                                                                |                                                                   |
|                                                                                                                                                                             | Blurred vision                                                           |                                                                   |
|                                                                                                                                                                             | Balance problems                                                         |                                                                   |
|                                                                                                                                                                             | Sensitivity to light                                                     |                                                                   |
|                                                                                                                                                                             | Sensitivity to noise                                                     |                                                                   |
|                                                                                                                                                                             | Feeling slowed down                                                      |                                                                   |
|                                                                                                                                                                             | Feeling like “in a fog”                                                  |                                                                   |
|                                                                                                                                                                             | “Don’t feel right”                                                       |                                                                   |
|                                                                                                                                                                             | Difficulty concentrating                                                 |                                                                   |
|                                                                                                                                                                             | Difficulty remembering                                                   |                                                                   |
|                                                                                                                                                                             | Fatigue or low energy                                                    |                                                                   |
|                                                                                                                                                                             | Confusion                                                                |                                                                   |
|                                                                                                                                                                             | Drowsiness                                                               |                                                                   |
|                                                                                                                                                                             | More emotional                                                           |                                                                   |
|                                                                                                                                                                             | Irritability                                                             |                                                                   |
|                                                                                                                                                                             | Sadness                                                                  |                                                                   |
|                                                                                                                                                                             | Nervous or anxious                                                       |                                                                   |
|                                                                                                                                                                             | Trouble falling asleep                                                   |                                                                   |
|                                                                                                                                                                             | Symptoms get worse with physical activity?                               |                                                                   |
|                                                                                                                                                                             | Symptoms get worse with mental activity?                                 |                                                                   |
|                                                                                                                                                                             | If 100% is feeling perfectly normal, what percent of normal do you feel? |                                                                   |
|                                                                                                                                                                             | <b>STEP 3 COGNITIVE SCREENING</b>                                        |                                                                   |
| <b>ORIENTATION</b>                                                                                                                                                          | Month                                                                    |                                                                   |
|                                                                                                                                                                             | Today’s date                                                             |                                                                   |
|                                                                                                                                                                             | Weekday                                                                  |                                                                   |
|                                                                                                                                                                             | Current year                                                             |                                                                   |
|                                                                                                                                                                             | Current time (within 1 hour)                                             |                                                                   |
| <b>IMMEDIATE MEMORY</b>                                                                                                                                                     | Repeat as many words as possible from a read list                        | Can tester interpret/LD association                               |
|                                                                                                                                                                             | Repeat a string of numbers                                               |                                                                   |
| <b>CONCENTRATION – Digits backwards</b>                                                                                                                                     | Repeat a string of numbers in reverse order                              |                                                                   |
|                                                                                                                                                                             | Tell the months of the year in reverse order                             |                                                                   |
| <b>MONTHS IN REVERSE ORDER</b>                                                                                                                                              |                                                                          |                                                                   |
| <b>STEP 4 NEUROLOGICAL SCREEN</b>                                                                                                                                           | Read out loud and follow instructions without difficulty                 |                                                                   |
|                                                                                                                                                                             | Full range of pain-free PASSIVE cervical spine movement                  |                                                                   |

|                                                       |                                                                         |        |
|-------------------------------------------------------|-------------------------------------------------------------------------|--------|
|                                                       | (fixed head) Look side-to-side and up-and-down                          | Green  |
|                                                       | Perform finger nose coordination test normally                          | Green  |
|                                                       | Perform tandem gait normally                                            | Green  |
| <b>BALANCE EXAMINATION</b>                            | Double leg stance                                                       | Green  |
| Modified Balance Error Scoring System (mBESS) testing | Single leg stance (non-dominant foot)                                   | Green  |
|                                                       | Tandem stance (non-dominant foot at back)                               | Green  |
| <b>STEP 5 DELAYED RECALL</b>                          | Repeat as many words as possible from the previously read list (step 3) | Yellow |

Green shading: no anticipated additional considerations for Para athletes; Yellow shading: potential additional considerations for some Para athletes (dependent on the level or nature of athlete impairment); Red shading: items from the SCAT5 that should not be used for Para athletes



## Considerations and usability of the 5th edition of the Sport Concussion Assessment Tool (SCAT5) for the office or off-field assessment in athletes with achondroplasia

|                                                                                                                                                                             |                                                                          |                                                 |
|-----------------------------------------------------------------------------------------------------------------------------------------------------------------------------|--------------------------------------------------------------------------|-------------------------------------------------|
| <b>STEP 1 ATHLETE BACKGROUND</b>                                                                                                                                            | Hospitalization for a head injury?                                       |                                                 |
|                                                                                                                                                                             | Headache disorder or migraines?                                          |                                                 |
|                                                                                                                                                                             | Learning disability / dyslexia?                                          |                                                 |
|                                                                                                                                                                             | ADD / ADHD?                                                              |                                                 |
|                                                                                                                                                                             | Depression, anxiety or other psychiatric disorder?                       |                                                 |
| <b>STEP 2 SYMPTOM EVALUATION</b><br>The athlete should be given the symptom form and asked to read this instruction paragraph out loud, and then complete the symptom scale | Symptom form with instructions                                           |                                                 |
|                                                                                                                                                                             | Headache                                                                 |                                                 |
|                                                                                                                                                                             | “Pressure in head”                                                       |                                                 |
|                                                                                                                                                                             | Neck pain                                                                | Increased incidence of atlantoaxial instability |
|                                                                                                                                                                             | Nausea or vomiting                                                       |                                                 |
|                                                                                                                                                                             | Dizziness                                                                |                                                 |
|                                                                                                                                                                             | Blurred vision                                                           |                                                 |
|                                                                                                                                                                             | Balance problems                                                         |                                                 |
|                                                                                                                                                                             | Sensitivity to light                                                     |                                                 |
|                                                                                                                                                                             | Sensitivity to noise                                                     |                                                 |
|                                                                                                                                                                             | Feeling slowed down                                                      |                                                 |
|                                                                                                                                                                             | Feeling like “in a fog”                                                  |                                                 |
|                                                                                                                                                                             | “Don’t feel right”                                                       |                                                 |
|                                                                                                                                                                             | Difficulty concentrating                                                 |                                                 |
|                                                                                                                                                                             | Difficulty remembering                                                   |                                                 |
|                                                                                                                                                                             | Fatigue or low energy                                                    |                                                 |
|                                                                                                                                                                             | Confusion                                                                |                                                 |
|                                                                                                                                                                             | Drowsiness                                                               |                                                 |
|                                                                                                                                                                             | More emotional                                                           |                                                 |
|                                                                                                                                                                             | Irritability                                                             |                                                 |
|                                                                                                                                                                             | Sadness                                                                  |                                                 |
|                                                                                                                                                                             | Nervous or anxious                                                       |                                                 |
|                                                                                                                                                                             | Trouble falling asleep                                                   |                                                 |
|                                                                                                                                                                             | Symptoms get worse with physical activity?                               |                                                 |
|                                                                                                                                                                             | Symptoms get worse with mental activity?                                 |                                                 |
|                                                                                                                                                                             | If 100% is feeling perfectly normal, what percent of normal do you feel? |                                                 |
|                                                                                                                                                                             | <b>STEP 3 COGNITIVE SCREENING</b>                                        |                                                 |
| <b>ORIENTATION</b>                                                                                                                                                          | Month                                                                    |                                                 |
|                                                                                                                                                                             | Today’s date                                                             |                                                 |
|                                                                                                                                                                             | Weekday                                                                  |                                                 |
|                                                                                                                                                                             | Current year                                                             |                                                 |
|                                                                                                                                                                             | Current time (within 1 hour)                                             |                                                 |
| <b>IMMEDIATE MEMORY</b>                                                                                                                                                     | Repeat as many words as possible from a read list                        |                                                 |
| <b>CONCENTRATION – Digits backwards</b>                                                                                                                                     | Repeat a string of numbers                                               |                                                 |
|                                                                                                                                                                             | Repeat a string of numbers in reverse order                              |                                                 |
| <b>MONTHS IN REVERSE ORDER</b>                                                                                                                                              | Tell the months of the year in reverse order                             |                                                 |
| <b>STEP 4 NEUROLOGICAL SCREEN</b>                                                                                                                                           | Read out loud and follow instructions without difficulty                 |                                                 |
|                                                                                                                                                                             | Full range of pain-free PASSIVE cervical spine movement                  | Increased incidence of atlantoaxial instability |

|                                                       |                                                                         |  |
|-------------------------------------------------------|-------------------------------------------------------------------------|--|
|                                                       | (fixed head) Look side-to-side and up-and-down                          |  |
|                                                       | Perform finger nose coordination test normally                          |  |
|                                                       | Perform tandem gait normally                                            |  |
| <b>BALANCE EXAMINATION</b>                            | Double leg stance                                                       |  |
| Modified Balance Error Scoring System (mBESS) testing | Single leg stance (non-dominant foot)                                   |  |
|                                                       | Tandem stance (non-dominant foot at back)                               |  |
| <b>STEP 5 DELAYED RECALL</b>                          | Repeat as many words as possible from the previously read list (step 3) |  |

Green shading: no anticipated additional considerations for Para athletes; Yellow shading: potential additional considerations for some Para athletes (dependent on the level or nature of athlete impairment); Red shading: items from the SCAT5 that should not be used for Para athletes

## Considerations and usability of the 5th edition of the Sport Concussion Assessment Tool (SCAT5) for the office or off-field assessment in athletes with arthrogyrosis

|                                                                                                                                                                             |                                                          |                                                                     |
|-----------------------------------------------------------------------------------------------------------------------------------------------------------------------------|----------------------------------------------------------|---------------------------------------------------------------------|
| <b>STEP 1 ATHLETE BACKGROUND</b>                                                                                                                                            | Hospitalization for a head injury?                       |                                                                     |
|                                                                                                                                                                             | Headache disorder or migraines?                          |                                                                     |
|                                                                                                                                                                             | Learning disability / dyslexia?                          |                                                                     |
|                                                                                                                                                                             | ADD / ADHD?                                              |                                                                     |
|                                                                                                                                                                             | Depression, anxiety or other psychiatric disorder?       |                                                                     |
| <b>STEP 2 SYMPTOM EVALUATION</b><br>The athlete should be given the symptom form and asked to read this instruction paragraph out loud, and then complete the symptom scale | Symptom form with instructions                           |                                                                     |
|                                                                                                                                                                             | Headache                                                 |                                                                     |
|                                                                                                                                                                             | “Pressure in head”                                       |                                                                     |
|                                                                                                                                                                             | Neck pain                                                |                                                                     |
|                                                                                                                                                                             | Nausea or vomiting                                       |                                                                     |
|                                                                                                                                                                             | Dizziness                                                |                                                                     |
|                                                                                                                                                                             | Blurred vision                                           |                                                                     |
|                                                                                                                                                                             | Balance problems                                         | Weakness/balance may be difficult to assess given reduced joint ROM |
|                                                                                                                                                                             | Sensitivity to light                                     |                                                                     |
|                                                                                                                                                                             | Sensitivity to noise                                     |                                                                     |
|                                                                                                                                                                             | Feeling slowed down                                      |                                                                     |
|                                                                                                                                                                             | Feeling like “in a fog”                                  |                                                                     |
|                                                                                                                                                                             | “Don’t feel right”                                       |                                                                     |
|                                                                                                                                                                             | Difficulty concentrating                                 |                                                                     |
|                                                                                                                                                                             | Difficulty remembering                                   |                                                                     |
|                                                                                                                                                                             | Fatigue or low energy                                    |                                                                     |
|                                                                                                                                                                             | Confusion                                                |                                                                     |
|                                                                                                                                                                             | Drowsiness                                               |                                                                     |
|                                                                                                                                                                             | More emotional                                           |                                                                     |
|                                                                                                                                                                             | Irritability                                             |                                                                     |
|                                                                                                                                                                             | Sadness                                                  |                                                                     |
|                                                                                                                                                                             | Nervous or anxious                                       |                                                                     |
|                                                                                                                                                                             | Trouble falling asleep                                   |                                                                     |
| Symptoms get worse with physical activity?                                                                                                                                  |                                                          |                                                                     |
| Symptoms get worse with mental activity?                                                                                                                                    |                                                          |                                                                     |
| If 100% is feeling perfectly normal, what percent of normal do you feel?                                                                                                    |                                                          |                                                                     |
| <b>STEP 3 COGNITIVE SCREENING</b>                                                                                                                                           |                                                          |                                                                     |
| <b>ORIENTATION</b>                                                                                                                                                          | Month                                                    |                                                                     |
|                                                                                                                                                                             | Today’s date                                             |                                                                     |
|                                                                                                                                                                             | Weekday                                                  |                                                                     |
|                                                                                                                                                                             | Current year                                             |                                                                     |
|                                                                                                                                                                             | Current time (within 1 hour)                             |                                                                     |
| <b>IMMEDIATE MEMORY</b>                                                                                                                                                     | Repeat as many words as possible from a read list        |                                                                     |
|                                                                                                                                                                             | Repeat a string of numbers                               |                                                                     |
| <b>CONCENTRATION – Digits backwards</b>                                                                                                                                     | Repeat a string of numbers                               |                                                                     |
|                                                                                                                                                                             | Repeat a string of numbers in reverse order              |                                                                     |
| <b>MONTHS IN REVERSE ORDER</b>                                                                                                                                              | Tell the months of the year in reverse order             |                                                                     |
| <b>STEP 4 NEUROLOGICAL SCREEN</b>                                                                                                                                           | Read out loud and follow instructions without difficulty |                                                                     |
|                                                                                                                                                                             | Full range of pain-free PASSIVE cervical spine movement  | May be altered due to reduced joint ROM                             |

|                                                       |                                                                         |                                               |
|-------------------------------------------------------|-------------------------------------------------------------------------|-----------------------------------------------|
|                                                       | (fixed head) Look side-to-side and up-and-down                          |                                               |
|                                                       | Perform finger nose coordination test normally                          | May be altered due to reduced joint ROM       |
|                                                       | Perform tandem gait normally                                            | May be altered due to reduced joint ROM       |
| <b>BALANCE EXAMINATION</b>                            | Double leg stance                                                       | Gait affected in those with LE manifestations |
| Modified Balance Error Scoring System (mBESS) testing | Single leg stance (non-dominant foot)                                   | Gait affected in those with LE manifestations |
|                                                       | Tandem stance (non-dominant foot at back)                               | Gait affected in those with LE manifestations |
| <b>STEP 5 DELAYED RECALL</b>                          | Repeat as many words as possible from the previously read list (step 3) |                                               |

Green shading: no anticipated additional considerations for Para athletes; Yellow shading: potential additional considerations for some Para athletes (dependent on the level or nature of athlete impairment); Red shading: items from the SCAT5 that should not be used for Para athletes

## Considerations and usability of the 5th edition of the Sport Concussion Assessment Tool (SCAT5) for the office or off-field assessment in athletes with polio

|                                                                                                                                                                             |                                                                                                        |                                          |
|-----------------------------------------------------------------------------------------------------------------------------------------------------------------------------|--------------------------------------------------------------------------------------------------------|------------------------------------------|
| <b>STEP 1 ATHLETE BACKGROUND</b>                                                                                                                                            | Hospitalization for a head injury?                                                                     |                                          |
|                                                                                                                                                                             | Headache disorder or migraines?                                                                        |                                          |
|                                                                                                                                                                             | Learning disability / dyslexia?                                                                        |                                          |
|                                                                                                                                                                             | ADD / ADHD?                                                                                            |                                          |
|                                                                                                                                                                             | Depression, anxiety or other psychiatric disorder?                                                     |                                          |
| <b>STEP 2 SYMPTOM EVALUATION</b><br>The athlete should be given the symptom form and asked to read this instruction paragraph out loud, and then complete the symptom scale | Symptom form with instructions                                                                         |                                          |
|                                                                                                                                                                             | Headache                                                                                               |                                          |
|                                                                                                                                                                             | “Pressure in head”                                                                                     |                                          |
|                                                                                                                                                                             | Neck pain                                                                                              | Dependent on which muscles affected      |
|                                                                                                                                                                             | Nausea or vomiting                                                                                     |                                          |
|                                                                                                                                                                             | Dizziness                                                                                              |                                          |
|                                                                                                                                                                             | Blurred vision                                                                                         |                                          |
|                                                                                                                                                                             | Balance problems                                                                                       | Dependent on which muscles affected      |
|                                                                                                                                                                             | Sensitivity to light                                                                                   |                                          |
|                                                                                                                                                                             | Sensitivity to noise                                                                                   |                                          |
|                                                                                                                                                                             | Feeling slowed down                                                                                    | Consider presence in post polio syndrome |
|                                                                                                                                                                             | Feeling like “in a fog”                                                                                | Consider presence in post polio syndrome |
|                                                                                                                                                                             | “Don’t feel right”                                                                                     | Consider presence in post polio syndrome |
|                                                                                                                                                                             | Difficulty concentrating                                                                               | Consider presence in post polio syndrome |
|                                                                                                                                                                             | Difficulty remembering                                                                                 | Consider presence in post polio syndrome |
|                                                                                                                                                                             | Fatigue or low energy                                                                                  | Consider presence in post polio syndrome |
|                                                                                                                                                                             | Confusion                                                                                              |                                          |
|                                                                                                                                                                             | Drowsiness                                                                                             | Consider presence in post polio syndrome |
|                                                                                                                                                                             | More emotional                                                                                         |                                          |
|                                                                                                                                                                             | Irritability                                                                                           |                                          |
|                                                                                                                                                                             | Sadness                                                                                                |                                          |
|                                                                                                                                                                             | Nervous or anxious                                                                                     |                                          |
|                                                                                                                                                                             | Trouble falling asleep                                                                                 |                                          |
| Symptoms get worse with physical activity?                                                                                                                                  | Consider presence in post polio syndrome                                                               |                                          |
| Symptoms get worse with mental activity?                                                                                                                                    | Consider presence in post polio syndrome                                                               |                                          |
| If 100% is feeling perfectly normal, what percent of normal do you feel?                                                                                                    |                                                                                                        |                                          |
| <b>STEP 3 COGNITIVE SCREENING</b>                                                                                                                                           |                                                                                                        |                                          |
| <b>ORIENTATION</b>                                                                                                                                                          | Month                                                                                                  |                                          |
|                                                                                                                                                                             | Today’s date                                                                                           |                                          |
|                                                                                                                                                                             | Weekday                                                                                                |                                          |
|                                                                                                                                                                             | Current year                                                                                           |                                          |
|                                                                                                                                                                             | Current time (within 1 hour)                                                                           |                                          |
| <b>IMMEDIATE MEMORY</b>                                                                                                                                                     | Repeat as many words as possible from a read list                                                      |                                          |
| <b>CONCENTRATION – Digits backwards</b>                                                                                                                                     | Repeat a string of numbers                                                                             |                                          |
|                                                                                                                                                                             | Repeat a string of numbers in reverse order                                                            |                                          |
| <b>MONTHS IN REVERSE ORDER</b>                                                                                                                                              | Tell the months of the year in reverse order                                                           |                                          |
| <b>STEP 4 NEUROLOGICAL SCREEN</b>                                                                                                                                           | Read out loud and follow instructions without difficulty                                               |                                          |
|                                                                                                                                                                             | Full range of pain-free PASSIVE cervical spine movement (fixed head) Look side-to-side and up-and-down | Dependent on which muscles affected      |
|                                                                                                                                                                             |                                                                                                        |                                          |

|                                                       |                                                                         |                                                                 |
|-------------------------------------------------------|-------------------------------------------------------------------------|-----------------------------------------------------------------|
|                                                       | Perform finger nose coordination test normally                          | Likely to have baseline weakness (less likely tingling/burning) |
|                                                       | Perform tandem gait normally                                            | Likely to have baseline weakness (less likely tingling/burning) |
| <b>BALANCE EXAMINATION</b>                            | Double leg stance                                                       | Dependent on which muscles affected                             |
| Modified Balance Error Scoring System (mBESS) testing | Single leg stance (non-dominant foot)                                   | Dependent on which muscles affected                             |
|                                                       | Tandem stance (non-dominant foot at back)                               | Dependent on which muscles affected                             |
| <b>STEP 5 DELAYED RECALL</b>                          | Repeat as many words as possible from the previously read list (step 3) |                                                                 |

Green shading: no anticipated additional considerations for Para athletes; Yellow shading: potential additional considerations for some Para athletes (dependent on the level or nature of athlete impairment); Red shading: items from the SCAT5 that should not be used for Para athletes

## Considerations and usability of the 5th edition of the Sport Concussion Assessment Tool (SCAT5) for the office or off-field assessment in athletes with muscular dystrophy

|                                                                                                                                                                             |                                                          |                                       |
|-----------------------------------------------------------------------------------------------------------------------------------------------------------------------------|----------------------------------------------------------|---------------------------------------|
| <b>STEP 1 ATHLETE BACKGROUND</b>                                                                                                                                            | Hospitalization for a head injury?                       |                                       |
|                                                                                                                                                                             | Headache disorder or migraines?                          |                                       |
|                                                                                                                                                                             | Learning disability / dyslexia?                          |                                       |
|                                                                                                                                                                             | ADD / ADHD?                                              |                                       |
|                                                                                                                                                                             | Depression, anxiety or other psychiatric disorder?       |                                       |
| <b>STEP 2 SYMPTOM EVALUATION</b><br>The athlete should be given the symptom form and asked to read this instruction paragraph out loud, and then complete the symptom scale | Symptom form with instructions                           |                                       |
|                                                                                                                                                                             | Headache                                                 |                                       |
|                                                                                                                                                                             | “Pressure in head”                                       |                                       |
|                                                                                                                                                                             | Neck pain                                                |                                       |
|                                                                                                                                                                             | Nausea or vomiting                                       |                                       |
|                                                                                                                                                                             | Dizziness                                                | Vision can be affected in OPMD        |
|                                                                                                                                                                             | Blurred vision                                           | Vision can be affected in OPMD        |
|                                                                                                                                                                             | Balance problems                                         |                                       |
|                                                                                                                                                                             | Sensitivity to light                                     |                                       |
|                                                                                                                                                                             | Sensitivity to noise                                     |                                       |
|                                                                                                                                                                             | Feeling slowed down                                      |                                       |
|                                                                                                                                                                             | Feeling like “in a fog”                                  |                                       |
|                                                                                                                                                                             | “Don’t feel right”                                       |                                       |
|                                                                                                                                                                             | Difficulty concentrating                                 |                                       |
|                                                                                                                                                                             | Difficulty remembering                                   |                                       |
|                                                                                                                                                                             | Fatigue or low energy                                    | Increased risk common                 |
|                                                                                                                                                                             | Confusion                                                |                                       |
|                                                                                                                                                                             | Drowsiness                                               |                                       |
|                                                                                                                                                                             | More emotional                                           |                                       |
|                                                                                                                                                                             | Irritability                                             |                                       |
|                                                                                                                                                                             | Sadness                                                  |                                       |
|                                                                                                                                                                             | Nervous or anxious                                       |                                       |
|                                                                                                                                                                             | Trouble falling asleep                                   |                                       |
| Symptoms get worse with physical activity?                                                                                                                                  | Early fatigue is common in people with MD                |                                       |
| Symptoms get worse with mental activity?                                                                                                                                    |                                                          |                                       |
| If 100% is feeling perfectly normal, what percent of normal do you feel?                                                                                                    |                                                          |                                       |
| <b>STEP 3 COGNITIVE SCREENING</b>                                                                                                                                           |                                                          |                                       |
| <b>ORIENTATION</b>                                                                                                                                                          | Month                                                    |                                       |
|                                                                                                                                                                             | Today’s date                                             |                                       |
|                                                                                                                                                                             | Weekday                                                  |                                       |
|                                                                                                                                                                             | Current year                                             |                                       |
|                                                                                                                                                                             | Current time (within 1 hour)                             |                                       |
| <b>IMMEDIATE MEMORY</b>                                                                                                                                                     | Repeat as many words as possible from a read list        |                                       |
|                                                                                                                                                                             | Repeat a string of numbers                               |                                       |
| <b>CONCENTRATION – Digits backwards</b>                                                                                                                                     | Repeat a string of numbers in reverse order              |                                       |
|                                                                                                                                                                             | Tell the months of the year in reverse order             |                                       |
| <b>MONTHS IN REVERSE ORDER</b>                                                                                                                                              |                                                          |                                       |
| <b>STEP 4 NEUROLOGICAL SCREEN</b>                                                                                                                                           | Read out loud and follow instructions without difficulty |                                       |
|                                                                                                                                                                             | Full range of pain-free PASSIVE cervical spine movement  | May be altered due to muscle weakness |
|                                                                                                                                                                             | (fixed head) Look side-to-side and up-and-down           | Vision can be affected in OPMD        |

|                                                                                     |                                                                         |                                       |
|-------------------------------------------------------------------------------------|-------------------------------------------------------------------------|---------------------------------------|
|                                                                                     | Perform finger nose coordination test normally                          | May be altered due to muscle weakness |
|                                                                                     | Perform tandem gait normally                                            | May be altered due to muscle weakness |
| <b>BALANCE EXAMINATION</b><br>Modified Balance Error Scoring System (mBESS) testing | Double leg stance                                                       | May be altered due to muscle weakness |
|                                                                                     | Single leg stance (non-dominant foot)                                   | May be altered due to muscle weakness |
|                                                                                     | Tandem stance (non-dominant foot at back)                               | May be altered due to muscle weakness |
| <b>STEP 5 DELAYED RECALL</b>                                                        | Repeat as many words as possible from the previously read list (step 3) |                                       |

Green shading: no anticipated additional considerations for Para athletes; Yellow shading: potential additional considerations for some Para athletes (dependent on the level or nature of athlete impairment); Red shading: items from the SCAT5 that should not be used for Para athletes



## Considerations and usability of the 5th edition of the Sport Concussion Assessment Tool (SCAT5) for the office or off-field assessment in athletes with multiple sclerosis

|                                                                                                                                                                             |                                                          |                                                                     |
|-----------------------------------------------------------------------------------------------------------------------------------------------------------------------------|----------------------------------------------------------|---------------------------------------------------------------------|
| <b>STEP 1 ATHLETE BACKGROUND</b>                                                                                                                                            | Hospitalization for a head injury?                       |                                                                     |
|                                                                                                                                                                             | Headache disorder or migraines?                          |                                                                     |
|                                                                                                                                                                             | Learning disability / dyslexia?                          |                                                                     |
|                                                                                                                                                                             | ADD / ADHD?                                              |                                                                     |
|                                                                                                                                                                             | Depression, anxiety or other psychiatric disorder?       |                                                                     |
| <b>STEP 2 SYMPTOM EVALUATION</b><br>The athlete should be given the symptom form and asked to read this instruction paragraph out loud, and then complete the symptom scale | Symptom form with instructions                           |                                                                     |
|                                                                                                                                                                             | Headache                                                 | Headaches can be seen in MS especially if high burden brain lesions |
|                                                                                                                                                                             | “Pressure in head”                                       | Headaches can be seen in MS especially if high burden brain lesions |
|                                                                                                                                                                             | Neck pain                                                |                                                                     |
|                                                                                                                                                                             | Nausea or vomiting                                       |                                                                     |
|                                                                                                                                                                             | Dizziness                                                | Vision can be affected in MS                                        |
|                                                                                                                                                                             | Blurred vision                                           | Vision can be affected in MS                                        |
|                                                                                                                                                                             | Balance problems                                         |                                                                     |
|                                                                                                                                                                             | Sensitivity to light                                     |                                                                     |
|                                                                                                                                                                             | Sensitivity to noise                                     |                                                                     |
|                                                                                                                                                                             | Feeling slowed down                                      |                                                                     |
|                                                                                                                                                                             | Feeling like “in a fog”                                  |                                                                     |
|                                                                                                                                                                             | “Don’t feel right”                                       |                                                                     |
|                                                                                                                                                                             | Difficulty concentrating                                 |                                                                     |
|                                                                                                                                                                             | Difficulty remembering                                   |                                                                     |
|                                                                                                                                                                             | Fatigue or low energy                                    |                                                                     |
|                                                                                                                                                                             | Confusion                                                |                                                                     |
|                                                                                                                                                                             | Drowsiness                                               |                                                                     |
|                                                                                                                                                                             | More emotional                                           |                                                                     |
|                                                                                                                                                                             | Irritability                                             |                                                                     |
|                                                                                                                                                                             | Sadness                                                  |                                                                     |
|                                                                                                                                                                             | Nervous or anxious                                       |                                                                     |
|                                                                                                                                                                             | Trouble falling asleep                                   |                                                                     |
| Symptoms get worse with physical activity?                                                                                                                                  |                                                          |                                                                     |
| Symptoms get worse with mental activity?                                                                                                                                    |                                                          |                                                                     |
| If 100% is feeling perfectly normal, what percent of normal do you feel?                                                                                                    |                                                          |                                                                     |
| <b>STEP 3 COGNITIVE SCREENING</b>                                                                                                                                           |                                                          |                                                                     |
| <b>ORIENTATION</b>                                                                                                                                                          | Month                                                    |                                                                     |
|                                                                                                                                                                             | Today’s date                                             |                                                                     |
|                                                                                                                                                                             | Weekday                                                  |                                                                     |
|                                                                                                                                                                             | Current year                                             |                                                                     |
|                                                                                                                                                                             | Current time (within 1 hour)                             |                                                                     |
| <b>IMMEDIATE MEMORY</b>                                                                                                                                                     | Repeat as many words as possible from a read list        |                                                                     |
| <b>CONCENTRATION – Digits backwards</b>                                                                                                                                     | Repeat a string of numbers                               |                                                                     |
|                                                                                                                                                                             | Repeat a string of numbers in reverse order              |                                                                     |
| <b>MONTHS IN REVERSE ORDER</b>                                                                                                                                              | Tell the months of the year in reverse order             |                                                                     |
| <b>STEP 4 NEUROLOGICAL SCREEN</b>                                                                                                                                           | Read out loud and follow instructions without difficulty |                                                                     |
|                                                                                                                                                                             | Full range of pain-free PASSIVE cervical spine movement  | May be altered due to muscle weakness                               |

|                                                       |                                                                         |                                       |
|-------------------------------------------------------|-------------------------------------------------------------------------|---------------------------------------|
|                                                       | (fixed head) Look side-to-side and up-and-down                          |                                       |
|                                                       | Perform finger nose coordination test normally                          | May be altered due to muscle weakness |
|                                                       | Perform tandem gait normally                                            | May be altered due to muscle weakness |
| <b>BALANCE EXAMINATION</b>                            | Double leg stance                                                       | Peripheral strength affected in MS    |
| Modified Balance Error Scoring System (mBESS) testing | Single leg stance (non-dominant foot)                                   | Peripheral strength affected in MS    |
|                                                       | Tandem stance (non-dominant foot at back)                               | Peripheral strength affected in MS    |
| <b>STEP 5 DELAYED RECALL</b>                          | Repeat as many words as possible from the previously read list (step 3) |                                       |

Green shading: no anticipated additional considerations for Para athletes; Yellow shading: potential additional considerations for some Para athletes (dependent on the level or nature of athlete impairment); Red shading: items from the SCAT5 that should not be used for Para athletes

## Considerations and usability of the 5th edition of the Sport Concussion Assessment Tool (SCAT5) for the office or off-field assessment in athletes with spina bifida

|                                                                                                                                                                             |                                                          |                                                                 |
|-----------------------------------------------------------------------------------------------------------------------------------------------------------------------------|----------------------------------------------------------|-----------------------------------------------------------------|
| <b>STEP 1 ATHLETE BACKGROUND</b>                                                                                                                                            | Hospitalization for a head injury?                       |                                                                 |
|                                                                                                                                                                             | Headache disorder or migraines?                          |                                                                 |
|                                                                                                                                                                             | Learning disability / dyslexia?                          |                                                                 |
|                                                                                                                                                                             | ADD / ADHD?                                              |                                                                 |
|                                                                                                                                                                             | Depression, anxiety or other psychiatric disorder?       |                                                                 |
| <b>STEP 2 SYMPTOM EVALUATION</b><br>The athlete should be given the symptom form and asked to read this instruction paragraph out loud, and then complete the symptom scale | Symptom form with instructions                           |                                                                 |
|                                                                                                                                                                             | Headache                                                 | Headaches can be seen in SB especially if chronic hydrocephalus |
|                                                                                                                                                                             | “Pressure in head”                                       | Headaches can be seen in SB especially if chronic hydrocephalus |
|                                                                                                                                                                             | Neck pain                                                | Also a symptom of hydrocephalus                                 |
|                                                                                                                                                                             | Nausea or vomiting                                       | Also a symptom of hydrocephalus                                 |
|                                                                                                                                                                             | Dizziness                                                |                                                                 |
|                                                                                                                                                                             | Blurred vision                                           |                                                                 |
|                                                                                                                                                                             | Balance problems                                         |                                                                 |
|                                                                                                                                                                             | Sensitivity to light                                     |                                                                 |
|                                                                                                                                                                             | Sensitivity to noise                                     |                                                                 |
|                                                                                                                                                                             | Feeling slowed down                                      |                                                                 |
|                                                                                                                                                                             | Feeling like “in a fog”                                  |                                                                 |
|                                                                                                                                                                             | “Don’t feel right”                                       |                                                                 |
|                                                                                                                                                                             | Difficulty concentrating                                 | Also a symptom of hydrocephalus                                 |
|                                                                                                                                                                             | Difficulty remembering                                   | Also a symptom of hydrocephalus                                 |
|                                                                                                                                                                             | Fatigue or low energy                                    |                                                                 |
|                                                                                                                                                                             | Confusion                                                |                                                                 |
|                                                                                                                                                                             | Drowsiness                                               |                                                                 |
|                                                                                                                                                                             | More emotional                                           |                                                                 |
|                                                                                                                                                                             | Irritability                                             |                                                                 |
|                                                                                                                                                                             | Sadness                                                  |                                                                 |
| Nervous or anxious                                                                                                                                                          |                                                          |                                                                 |
| Trouble falling asleep                                                                                                                                                      |                                                          |                                                                 |
| Symptoms get worse with physical activity?                                                                                                                                  |                                                          |                                                                 |
| Symptoms get worse with mental activity?                                                                                                                                    |                                                          |                                                                 |
| If 100% is feeling perfectly normal, what percent of normal do you feel?                                                                                                    |                                                          |                                                                 |
| <b>STEP 3 COGNITIVE SCREENING</b>                                                                                                                                           |                                                          |                                                                 |
| <b>ORIENTATION</b>                                                                                                                                                          | Month                                                    |                                                                 |
|                                                                                                                                                                             | Today’s date                                             |                                                                 |
|                                                                                                                                                                             | Weekday                                                  |                                                                 |
|                                                                                                                                                                             | Current year                                             |                                                                 |
|                                                                                                                                                                             | Current time (within 1 hour)                             |                                                                 |
| <b>IMMEDIATE MEMORY</b>                                                                                                                                                     | Repeat as many words as possible from a read list        | Mild intellectual impairment often present in SB                |
|                                                                                                                                                                             | Repeat a string of numbers                               | Mild intellectual impairment often present in SB                |
| <b>CONCENTRATION – Digits backwards</b>                                                                                                                                     | Repeat a string of numbers in reverse order              | Mild intellectual impairment often present in SB                |
| <b>MONTHS IN REVERSE ORDER</b>                                                                                                                                              | Tell the months of the year in reverse order             |                                                                 |
| <b>STEP 4 NEUROLOGICAL SCREEN</b>                                                                                                                                           | Read out loud and follow instructions without difficulty | Mild intellectual impairment often present in SB                |
|                                                                                                                                                                             | Full range of pain-free PASSIVE cervical spine movement  |                                                                 |

|                                                                                     |                                                                         |                                                            |
|-------------------------------------------------------------------------------------|-------------------------------------------------------------------------|------------------------------------------------------------|
|                                                                                     | (fixed head) Look side-to-side and up-and-down                          |                                                            |
|                                                                                     | Perform finger nose coordination test normally                          |                                                            |
|                                                                                     | Perform tandem gait normally                                            | LE strength affected in SB; UE motor testing likely normal |
| <b>BALANCE EXAMINATION</b><br>Modified Balance Error Scoring System (mBESS) testing | Double leg stance                                                       | LE strength affected in SB; UE motor testing likely normal |
|                                                                                     | Single leg stance (non-dominant foot)                                   | LE strength affected in SB; UE motor testing likely normal |
|                                                                                     | Tandem stance (non-dominant foot at back)                               | LE strength affected in SB; UE motor testing likely normal |
| <b>STEP 5 DELAYED RECALL</b>                                                        | Repeat as many words as possible from the previously read list (step 3) | Mild intellectual impairment often present in SB           |

Green shading: no anticipated additional considerations for Para athletes; Yellow shading: potential additional considerations for some Para athletes (dependent on the level or nature of athlete impairment); Red shading: items from the SCAT5 that should not be used for Para athletes
